# Supplementary material
Source: PubMed Central journal article supplement (PMC3435197)

## S1. List of subjects and associated information included in analyses.

| Sample | Type | Normal tissue | Tumor reads | Normal reads | Aligner     | Sequencer | Sequencing center | Somatic total | Somatic coding | Somatic nonsyn | Somatic truncations | MSI | CIMP | Expression | Hyper-mutated | Anatomic Location | Tumor Stage |
|--------|------|---------------|-------------|--------------|-------------|-----------|-------------------|---------------|----------------|----------------|---------------------|-----|------|------------|---------------|-------------------|-------------|
| 2806   | AML  | Solid         | 172,035     | 126,563      | maq-0.7.1-9 | Illumina  | BI                | 0             | 0              | 0              | 0                   |     |      |            |               |                   |             |
| 2811   | AML  | Solid         | 107,019     | 221,785      | maq-0.7.1-9 | Illumina  | BI                | 2             | 1              | 1              | 0                   |     |      |            |               |                   |             |
| 2819   | AML  | Solid         | 101,693     | 191,303      | maq-0.7.1-9 | Illumina  | BI                | 1             | 1              | 0              | 0                   |     |      |            |               |                   |             |
| 2842   | AML  | Solid         | 36,288      |              | maq-0.7.1-9 | Illumina  | BI                | 1             | 1              | 1              | 0                   |     |      |            |               |                   |             |
| 2907   | AML  | Solid         | 938,570     | 1,615,228    | bwa-0.6.1   | Illumina  | WUGSC             | 0             | 0              | 0              | 0                   |     |      |            |               |                   |             |
| 2908   | AML  | Solid         | 173,212     | 24,065       | maq-0.7.1-9 | Illumina  | BI                | 2             | 1              | 1              | 0                   |     |      |            |               |                   |             |
| 2909   | AML  | Solid         | 120,558     | 365,373      | maq-0.7.1-9 | Illumina  | BI                | 0             | 0              | 0              | 0                   |     |      |            |               |                   |             |
| 2934   | AML  | Solid         | 80,226      | 690,759      | maq-0.7.1-9 | Illumina  | BI                | 0             | 0              | 0              | 0                   |     |      |            |               |                   |             |
| 2936   | AML  | Solid         | 69,173      | 27,401       | maq-0.7.1-9 | Illumina  | BI                | 0             | 0              | 0              | 0                   |     |      |            |               |                   |             |
| 2939   | AML  | Solid         | 106,640     | 683,217      | maq-0.7.1-9 | Illumina  | BI                | 2             | 2              | 1              | 0                   |     |      |            |               |                   |             |
| 2943   | AML  | Solid         | 60,088      | 925,131      | maq-0.7.1-9 | Illumina  | BI                | 0             | 0              | 0              | 0                   |     |      |            |               |                   |             |
| 2955   | AML  | Solid         | 28,435      | 46,061       | maq-0.7.1-9 | Illumina  | BI                | 1             | 1              | 1              | 0                   |     |      |            |               |                   |             |
| 2965   | AML  | Solid         | 1,330,548   | 1,081,376    | bwa-0.6.1   | Illumina  | WUGSC             | 0             | 0              | 0              | 0                   |     |      |            |               |                   |             |
| 2966   | AML  | Solid         | 1,224,716   | 1,481,882    | bwa-0.6.1   | Illumina  | WUGSC             | 0             | 0              | 0              | 0                   |     |      |            |               |                   |             |
| 2967   | AML  | Solid         | 1,443,960   | 674,316      | bwa-0.6.1   | Illumina  | WUGSC             | 1             | 1              | 1              | 1                   |     |      |            |               |                   |             |
| 2968   | AML  | Solid         | 1,981,152   | 657,432      | bwa-0.6.1   | Illumina  | WUGSC             | 0             | 0              | 0              | 0                   |     |      |            |               |                   |             |
| 2969   | AML  | Solid         | 1,036,304   | 392,900      | bwa-0.6.1   | Illumina  | WUGSC             | 0             | 0              | 0              | 0                   |     |      |            |               |                   |             |
| 2970   | AML  | Solid         | 1,385,202   | 498,452      | bwa-0.6.1   | Illumina  | WUGSC             | 1             | 1              | 1              | 0                   |     |      |            |               |                   |             |
| 2971   | AML  | Solid         | 1,508,504   | 845,468      | bwa-0.6.1   | Illumina  | WUGSC             | 0             | 0              | 0              | 0                   |     |      |            |               |                   |             |
| 2972   | AML  | Solid         | 2,122,386   | 2,219,176    | bwa-0.6.1   | Illumina  | WUGSC             | 0             | 0              | 0              | 0                   |     |      |            |               |                   |             |
| 2973   | AML  | Solid         | 1,710,206   | 436,514      | bwa-0.6.1   | Illumina  | WUGSC             | 0             | 0              | 0              | 0                   |     |      |            |               |                   |             |
| 2974   | AML  | Solid         | 1,294,446   | 654,344      | bwa-0.6.1   | Illumina  | WUGSC             | 1             | 1              | 1              | 0                   |     |      |            |               |                   |             |
| 2975   | AML  | Solid         | 1,838,636   | 601,524      | bwa-0.6.1   | Illumina  | WUGSC             | 0             | 0              | 0              | 0                   |     |      |            |               |                   |             |
| 2977   | AML  | Solid         | 1,216,098   | 1,180,616    | bwa-0.6.1   | Illumina  | WUGSC             | 0             | 0              | 0              | 0                   |     |      |            |               |                   |             |
| 2978   | AML  | Solid         | 1,532,348   | 1,686,062    | bwa-0.6.1   | Illumina  | WUGSC             | 2             | 1              | 1              | 0                   |     |      |            |               |                   |             |
| 2981   | AML  | Solid         | 1,758,286   | 327,208      | bwa-0.6.1   | Illumina  | WUGSC             | 0             | 0              | 0              | 0                   |     |      |            |               |                   |             |
| 2983   | AML  | Solid         | 2,508,752   | 830,970      | bwa-0.6.1   | Illumina  | WUGSC             | 1             | 0              | 0              | 0                   |     |      |            |               |                   |             |

|      |      |       |           |           |           |          |         |   |   |   |   |            |          |          |     |                  |            |
|------|------|-------|-----------|-----------|-----------|----------|---------|---|---|---|---|------------|----------|----------|-----|------------------|------------|
| 2985 | AML  | Solid | 1,224,660 | 835,614   | bwa-0.6.1 | Illumina | WUGSC   | 0 | 0 | 0 | 0 |            |          |          |     |                  |            |
| 2986 | AML  | Solid | 1,618,540 | 2,443,610 | bwa-0.6.1 | Illumina | WUGSC   | 0 | 0 | 0 | 0 |            |          |          |     |                  |            |
| 2987 | AML  | Solid | 508,310   | 1,793,657 | bwa-0.5.5 | Illumina | WUGSC   | 0 | 0 | 0 | 0 |            |          |          |     |                  |            |
| 2989 | AML  | Solid | 1,497,450 | 1,667,752 | bwa-0.6.1 | Illumina | WUGSC   | 0 | 0 | 0 | 0 |            |          |          |     |                  |            |
| 2995 | AML  | Solid | 1,350,964 | 1,401,700 | bwa-0.6.1 | Illumina | WUGSC   | 0 | 0 | 0 | 0 |            |          |          |     |                  |            |
| 2996 | AML  | Solid | 1,360,262 | 1,281,124 | bwa-0.6.1 | Illumina | WUGSC   | 2 | 2 | 2 | 0 |            |          |          |     |                  |            |
| 3000 | AML  | Solid | 976,972   | 1,026,600 | bwa-0.6.1 | Illumina | WUGSC   | 0 | 0 | 0 | 0 |            |          |          |     |                  |            |
| 3002 | AML  | Solid | 1,504,574 | 3,458,808 | bwa-0.6.1 | Illumina | WUGSC   | 0 | 0 | 0 | 0 |            |          |          |     |                  |            |
| 3005 | AML  | Solid | 1,093,376 | 1,790,734 | bwa-0.6.1 | Illumina | WUGSC   | 0 | 0 | 0 | 0 |            |          |          |     |                  |            |
| 3009 | AML  | Solid | 1,618,940 | 2,233,820 | bwa-0.6.1 | Illumina | WUGSC   | 5 | 5 | 3 | 1 |            |          |          |     |                  |            |
| 2670 | COAD | Blood | 140,467   | 489,330   | bwa-0.5.9 | Illumina | Harvard | 0 | 0 | 0 | 0 | MSS        | Cluster3 | CIN      | NO  | NA               | NA         |
| 2671 | COAD | Blood | 132,367   | 392,543   | bwa-0.5.9 | Illumina | Harvard | 1 | 1 | 1 | 0 | Not Tested | NA       | NA       | NA  | Sigmoid Colon    | Stage IV   |
| 2672 | COAD | Blood | 130,102   | 160,892   | bwa-0.5.9 | Illumina | Harvard | 3 | 3 | 2 | 0 | MSI-H      | CIMP.H   | MSI/CIMP | YES | Transverse Colon | Stage IIIB |
| 2674 | COAD | Blood | 97,391    | 179,869   | bwa-0.5.9 | Illumina | Harvard | 1 | 0 | 0 | 0 | MSS        | Cluster4 | MSI/CIMP | NO  | Sigmoid Colon    | Stage IV   |
| 2676 | COAD | Blood | 115,178   | 239,964   | bwa-0.5.9 | Illumina | Harvard | 3 | 2 | 2 | 0 | MSI-H      | CIMP.H   | MSI/CIMP | YES | Cecum            | Stage IIB  |
| 2678 | COAD | Blood | 163,222   | 478,762   | bwa-0.5.9 | Illumina | Harvard | 0 | 0 | 0 | 0 | MSS        | Cluster3 | Invasive | NO  | Transverse Colon | Stage IIIB |
| 2679 | COAD | Blood | 46,175    | 170,985   | bwa-0.5.9 | Illumina | Harvard | 2 | 1 | 1 | 1 | Not Tested | NA       | NA       | NA  | Ascending Colon  | Stage IIB  |
| 2680 | COAD | Blood | 110,680   | 446,579   | bwa-0.5.9 | Illumina | Harvard | 1 | 0 | 0 | 0 | Not Tested | NA       | NA       | NA  | Hepatic Flexure  | Stage II   |
| 2681 | COAD | Blood | 65,333    | 450,746   | bwa-0.5.9 | Illumina | Harvard | 0 | 0 | 0 | 0 | Not Tested | NA       | NA       | NA  | Cecum            | Stage IIA  |
| 2682 | COAD | Blood | 108,648   | 562,538   | bwa-0.5.9 | Illumina | Harvard | 0 | 0 | 0 | 0 | Not Tested | NA       | NA       | NA  | Cecum            | Stage IV   |
| 2683 | COAD | Blood | 103,486   | 541,486   | bwa-0.5.9 | Illumina | Harvard | 3 | 3 | 1 | 0 | MSI-L      | CIMP.L   | CIN      | NO  | Ascending Colon  | Stage IV   |
| 2684 | COAD | Blood | 14,926    | 157,163   | bwa-0.5.9 | Illumina | Harvard | 0 | 0 | 0 | 0 | Not Tested | NA       | NA       | NA  | Cecum            | Stage I    |
| 3509 | COAD | Solid | 113,991   | 230,765   | bwa-0.5.9 | Illumina | Harvard | 1 | 1 | 1 | 1 | Not Tested | NA       | NA       | NA  | Sigmoid Colon    | Stage II   |
| 3510 | COAD | Solid | 167,823   | 503,988   | bwa-0.5.9 | Illumina | Harvard | 0 | 0 | 0 | 0 | Not Tested | NA       | NA       | NA  | Transverse Colon | Stage II   |
| 3514 | COAD | Blood | 138,541   | 795,875   | bwa-0.5.9 | Illumina | Harvard | 0 | 0 | 0 | 0 | MSS        | Cluster3 | MSI/CIMP | NO  | Ascending Colon  | Stage I    |
| 3516 | COAD | Blood | 108,072   | 236,502   | bwa-0.5.9 | Illumina | Harvard | 1 | 1 | 1 | 0 | MSI-H      | CIMP.H   | MSI/CIMP | YES | Ascending Colon  | Stage III  |
| 3529 | COAD | Solid | 245,602   | 817,109   | bwa-0.5.9 | Illumina | Harvard | 0 | 0 | 0 | 0 | MSI-L      | Cluster4 | CIN      | NO  | Sigmoid Colon    | Stage IIIC |
| 3534 | COAD | Blood | 3,840,670 | 999,542   | bwa-0.5.9 | Illumina | BCM     | 3 | 2 | 1 | 0 | MSS        | Cluster3 | CIN      | NO  | Ascending Colon  | Stage IIA  |
| 3548 | COAD | Blood | 161,551   | 315,369   | bwa-0.5.9 | Illumina | Harvard | 2 | 1 | 1 | 1 | MSS        | Cluster3 | CIN      | NO  | Cecum            | Stage IIIC |
| 3549 | COAD | Blood | 98,156    | 414,253   | bwa-0.5.9 | Illumina | Harvard | 0 | 0 | 0 | 0 | MSS        | CIMP.L   | CIN      | NO  | Cecum            | Stage I    |
| 3553 | COAD | Blood | 249,536   | 245,326   | bwa-0.5.9 | Illumina | Harvard | 1 | 1 | 1 | 1 | MSI-L      | Cluster4 | CIN      | NO  | Sigmoid Colon    | Stage I    |

|      |      |       |         |         |           |          |         |   |   |   |   |            |          |          |     |                  |            |
|------|------|-------|---------|---------|-----------|----------|---------|---|---|---|---|------------|----------|----------|-----|------------------|------------|
| 3555 | COAD | Blood | 193,719 | 119,868 | bwa-0.5.9 | Illumina | Harvard | 2 | 1 | 1 | 0 | MSS        | CIMP.L   | MSI/CIMP | YES | Hepatic Flexure  | Stage IIA  |
| 3558 | COAD | Blood | 177,912 | 515,731 | bwa-0.5.9 | Illumina | Harvard | 2 | 1 | 1 | 0 | MSS        | CIMP.L   | Invasive | NO  | Sigmoid Colon    | NA         |
| 3664 | COAD | Blood | 181,258 | 400,386 | bwa-0.5.9 | Illumina | Harvard | 1 | 0 | 0 | 0 | MSS        | CIMP.H   | MSI/CIMP | NO  | Cecum            | Stage II   |
| 3666 | COAD | Blood | 240,336 | 382,297 | bwa-0.5.9 | Illumina | Harvard | 3 | 3 | 3 | 1 | MSS        | Cluster4 | Invasive | NO  | Cecum            | Stage III  |
| 3672 | COAD | Blood | 114,652 | 129,619 | bwa-0.5.9 | Illumina | Harvard | 0 | 0 | 0 | 0 | MSI-H      | CIMP.H   | MSI/CIMP | YES | Transverse Colon | Stage III  |
| 3675 | COAD | Blood | 217,808 | 541,740 | bwa-0.5.9 | Illumina | Harvard | 2 | 2 | 2 | 0 | Not Tested | CIMP.L   | NA       | NA  | Hepatic Flexure  | Stage II   |
| 3681 | COAD | Blood | 156,095 | 463,061 | bwa-0.5.9 | Illumina | Harvard | 0 | 0 | 0 | 0 | MSS        | CIMP.L   | MSI/CIMP | NO  | Cecum            | Stage III  |
| 3685 | COAD | Blood | 134,991 | 449,190 | bwa-0.5.9 | Illumina | Harvard | 0 | 0 | 0 | 0 | MSS        | Cluster4 | Invasive | NO  | Sigmoid Colon    | Stage II   |
| 3688 | COAD | Blood | 143,522 | 82,192  | bwa-0.5.9 | Illumina | Harvard | 3 | 2 | 2 | 0 | MSS        | Cluster4 | CIN      | NO  | Sigmoid Colon    | Stage IV   |
| 3692 | COAD | Blood | 110,024 | 231,482 | bwa-0.5.9 | Illumina | Harvard | 0 | 0 | 0 | 0 | MSS        | Cluster4 | Invasive | NO  | Splenic Flexure  | Stage IV   |
| 3693 | COAD | Blood | 108,218 | 348,057 | bwa-0.5.9 | Illumina | Harvard | 2 | 2 | 2 | 2 | MSS        | Cluster4 | CIN      | NO  | Sigmoid Colon    | Stage IV   |
| 3715 | COAD | Blood | 93,318  | 112,830 | bwa-0.5.9 | Illumina | Harvard | 7 | 7 | 6 | 1 | MSI-H      | CIMP.H   | MSI/CIMP | YES | Ascending Colon  | Stage II   |
| 3807 | COAD | Solid | 424,159 | 426,668 | bwa-0.5.9 | Illumina | Harvard | 2 | 0 | 0 | 0 | MSS        | Cluster4 | MSI/CIMP | NO  | Sigmoid Colon    | Stage IIIC |
| 3808 | COAD | Solid | 413,591 | 420,815 | bwa-0.5.9 | Illumina | Harvard | 1 | 0 | 0 | 0 | MSI-L      | Cluster3 | MSI/CIMP | NO  | Cecum            | Stage IIA  |
| 3810 | COAD | Solid | 469,400 | 329,459 | bwa-0.5.9 | Illumina | Harvard | 2 | 1 | 1 | 1 | MSS        | Cluster4 | MSI/CIMP | NO  | Sigmoid Colon    | Stage IIA  |
| 3812 | COAD | Blood | 137,004 | 534,804 | bwa-0.5.9 | Illumina | Harvard | 1 | 0 | 0 | 0 | MSS        | Cluster4 | MSI/CIMP | NO  | Sigmoid Colon    | Stage IIA  |
| 3861 | COAD | Blood | 193,657 | 651,699 | bwa-0.5.9 | Illumina | Harvard | 3 | 2 | 2 | 0 | Not Tested | CIMP.L   | Invasive | NA  | Cecum            | Stage IIA  |
| 3947 | COAD | Blood | 199,154 | 336,480 | bwa-0.5.9 | Illumina | Harvard | 0 | 0 | 0 | 0 | MSI-H      | CIMP.H   | MSI/CIMP | YES | Ascending Colon  | Stage IIB  |
| 3955 | COAD | Blood | 47,892  | 42,494  | bwa-0.5.9 | Illumina | BCM     | 0 | 0 | 0 | 0 | MSS        | Cluster4 | CIN      | NO  | Descending Colon | Stage IIIB |
| 3956 | COAD | Blood | 98,515  | 588,418 | bwa-0.5.9 | Illumina | Harvard | 0 | 0 | 0 | 0 | MSS        | Cluster3 | CIN      | NO  | Cecum            | Stage IIA  |
| 3966 | COAD | Blood | 92,390  | 113,225 | bwa-0.5.9 | Illumina | Harvard | 2 | 1 | 1 | 0 | MSI-H      | CIMP.L   | MSI/CIMP | YES | Hepatic Flexure  | Stage IIA  |
| 3968 | COAD | Blood | 65,276  | 376,180 | bwa-0.5.9 | Illumina | Harvard | 3 | 3 | 3 | 0 | Not Tested | Cluster3 | CIN      | NA  | Sigmoid Colon    | Stage I    |
| 3970 | COAD | Blood | 68,156  | 241,363 | bwa-0.5.9 | Illumina | Harvard | 3 | 2 | 2 | 1 | Not Tested | Cluster3 | NA       | NA  | Sigmoid Colon    | Stage IIA  |
| 3994 | COAD | Blood | 97,264  | 437,069 | bwa-0.5.9 | Illumina | Harvard | 2 | 0 | 0 | 0 | MSS        | CIMP.H   | MSI/CIMP | NO  | Transverse Colon | Stage IIIB |
| 4070 | COAD | Blood | 29,878  | 142,820 | bwa-0.5.9 | Illumina | Harvard | 0 | 0 | 0 | 0 | MSS        | Cluster3 | CIN      | NO  | Cecum            | Stage IIIC |
| 4071 | COAD | Blood | 33,575  | 214,010 | bwa-0.5.9 | Illumina | Harvard | 3 | 3 | 3 | 1 | MSS        | Cluster3 | CIN      | NO  | NA               | Stage I    |
| 4308 | COAD | Blood | 103,810 | 748,569 | bwa-0.5.9 | Illumina | Harvard | 1 | 1 | 1 | 1 | Not Tested | NA       | NA       | NA  | Sigmoid Colon    | Stage IIIB |
| 4313 | COAD | Blood | 52,903  | 180,955 | bwa-0.5.9 | Illumina | Harvard | 1 | 1 | 1 | 0 | Not Tested | NA       | NA       | NA  | Descending Colon | Stage I    |
| 4315 | COAD | Blood | 126,020 | 293,581 | bwa-0.5.9 | Illumina | Harvard | 2 | 2 | 2 | 1 | Not Tested | NA       | NA       | NA  | Cecum            | Stage IIA  |
| 4614 | COAD | Blood | 95,422  | 145,883 | bwa-0.5.9 | Illumina | Harvard | 1 | 0 | 0 | 0 | Not Tested | NA       | NA       | NA  | NA               | Stage IVA  |
| 4615 | COAD | Blood | 71,521  | 158,197 | bwa-0.5.9 | Illumina | Harvard | 0 | 0 | 0 | 0 | Not Tested | NA       | NA       | NA  | NA               | Stage IIIB |

|      |      |       |         |         |           |          |         |   |   |   |   |            |          |          |     |                  |            |
|------|------|-------|---------|---------|-----------|----------|---------|---|---|---|---|------------|----------|----------|-----|------------------|------------|
| 4681 | COAD | Blood | 99,508  | 573,380 | bwa-0.5.9 | Illumina | Harvard | 0 | 0 | 0 | 0 | Not Tested | NA       | NA       | NA  | Ascending Colon  | Stage IIA  |
| 4682 | COAD | Blood | 60,584  | 684,231 | bwa-0.5.9 | Illumina | Harvard | 1 | 1 | 1 | 1 | Not Tested | NA       | NA       | NA  | Sigmoid Colon    | Stage IVA  |
| 4684 | COAD | Blood | 118,020 | 460,228 | bwa-0.5.9 | Illumina | Harvard | 2 | 2 | 2 | 1 | Not Tested | NA       | NA       | NA  | NA               | Stage IVA  |
| 4744 | COAD | Blood | 69,400  | 270,124 | bwa-0.5.9 | Illumina | Harvard | 1 | 1 | 1 | 0 | Not Tested | NA       | NA       | NA  | Cecum            | Stage I    |
| 4746 | COAD | Blood | 87,067  | 465,179 | bwa-0.5.9 | Illumina | Harvard | 2 | 2 | 1 | 1 | Not Tested | NA       | NA       | NA  | Sigmoid Colon    | Stage I    |
| 4747 | COAD | Blood | 277,924 | 714,931 | bwa-0.5.9 | Illumina | Harvard | 1 | 1 | 1 | 1 | Not Tested | NA       | NA       | NA  | Cecum            | Stage IVA  |
| 4748 | COAD | Blood | 91,371  | 564,672 | bwa-0.5.9 | Illumina | Harvard | 3 | 2 | 2 | 0 | Not Tested | NA       | NA       | NA  | Transverse Colon | Stage IIIB |
| 4750 | COAD | Blood | 122,492 | 634,810 | bwa-0.5.9 | Illumina | Harvard | 1 | 0 | 0 | 0 | Not Tested | NA       | NA       | NA  | NA               | Stage IIIA |
| 4752 | COAD | Blood | 112,385 | 401,114 | bwa-0.5.9 | Illumina | Harvard | 1 | 1 | 1 | 0 | Not Tested | NA       | NA       | NA  | Ascending Colon  | Stage IIA  |
| 4951 | COAD | Blood | 114,412 | 489,930 | bwa-0.5.9 | Illumina | Harvard | 1 | 0 | 0 | 0 | Not Tested | NA       | NA       | NA  | Ascending Colon  | Stage IIA  |
| 5256 | COAD | Blood | 147,563 | 193,095 | bwa-0.5.9 | Illumina | Harvard | 3 | 1 | 0 | 0 | Not Tested | NA       | NA       | NA  | Hepatic Flexure  | Stage IIA  |
| A00N | COAD | Blood | 252,882 | 208,397 | bwa-0.5.9 | Illumina | Harvard | 1 | 1 | 1 | 0 | MSI-L      | Cluster4 | MSI/CIMP | YES | Cecum            | Stage IIB  |
| A00Q | COAD | Blood | 271,031 | 201,040 | bwa-0.5.9 | Illumina | Harvard | 1 | 0 | 0 | 0 | Not Tested | CIMP.L   | CIN      | NO  | Sigmoid Colon    | Stage IIIB |
| A00R | COAD | Blood | 319,832 | 83,397  | bwa-0.5.9 | Illumina | Harvard | 1 | 1 | 1 | 0 | MSI-H      | CIMP.L   | MSI/CIMP | YES | Cecum            | Stage I    |
| A00U | COAD | Blood | 144,810 | 119,509 | bwa-0.5.9 | Illumina | Harvard | 1 | 0 | 0 | 0 | MSS        | CIMP.L   | Invasive | NO  | Ascending Colon  | Stage IIIB |
| A00W | COAD | Blood | 140,715 | 136,034 | bwa-0.5.9 | Illumina | Harvard | 2 | 2 | 2 | 1 | MSS        | Cluster3 | Invasive | NO  | Sigmoid Colon    | Stage I    |
| A00Z | COAD | Blood | 128,834 | 67,501  | bwa-0.5.9 | Illumina | Harvard | 3 | 2 | 2 | 1 | MSS        | Cluster4 | CIN      | NO  | Sigmoid Colon    | Stage IIA  |
| A010 | COAD | Blood | 333,269 | 130,309 | bwa-0.5.9 | Illumina | Harvard | 1 | 0 | 0 | 0 | MSI-L      | Cluster4 | MSI/CIMP | NO  | Transverse Colon | Stage IIB  |
| A01C | COAD | Blood | 147,640 | 143,524 | bwa-0.5.9 | Illumina | Harvard | 0 | 0 | 0 | 0 | Not Tested | Cluster4 | CIN      | NA  | Ascending Colon  | Stage IIIA |
| A01D | COAD | Blood | 128,335 | 155,052 | bwa-0.5.9 | Illumina | Harvard | 2 | 2 | 2 | 0 | MSS        | CIMP.L   | MSI/CIMP | NO  | Sigmoid Colon    | Stage IIIC |
| A01G | COAD | Blood | 684,297 | 111,839 | bwa-0.5.9 | Illumina | Harvard | 1 | 1 | 1 | 0 | MSI-L      | CIMP.L   | Invasive | NO  | Cecum            | Stage IIA  |
| A01I | COAD | Blood | 188,685 | 247,173 | bwa-0.5.9 | Illumina | Harvard | 2 | 2 | 2 | 1 | MSS        | CIMP.L   | Invasive | NO  | Sigmoid Colon    | Stage I    |
| A01K | COAD | Blood | 274,403 | 97,841  | bwa-0.5.9 | Illumina | Harvard | 0 | 0 | 0 | 0 | MSS        | Cluster3 | MSI/CIMP | NO  | Sigmoid Colon    | Stage IIIC |
| A01P | COAD | Solid | 344,626 | 83,882  | bwa-0.5.9 | Illumina | Harvard | 1 | 0 | 0 | 0 | MSI-H      | CIMP.H   | NA       | YES | Ascending Colon  | Stage IIIB |
| A01Q | COAD | Blood | 380,306 | 199,916 | bwa-0.5.9 | Illumina | Harvard | 1 | 0 | 0 | 0 | MSI-H      | CIMP.L   | MSI/CIMP | YES | Ascending Colon  | Stage II   |
| A01R | COAD | Solid | 349,112 | 96,374  | bwa-0.5.9 | Illumina | Harvard | 1 | 1 | 1 | 0 | MSI-H      | CIMP.L   | NA       | YES | Ascending Colon  | Stage IIIC |
| A01S | COAD | Solid | 413,372 | 146,205 | bwa-0.5.9 | Illumina | Harvard | 0 | 0 | 0 | 0 | MSI-L      | Cluster4 | NA       | NO  | Sigmoid Colon    | Stage IIIB |
| A01T | COAD | Solid | 365,609 | 141,869 | bwa-0.5.9 | Illumina | Harvard | 2 | 2 | 2 | 0 | MSS        | Cluster3 | NA       | NO  | Sigmoid Colon    | Stage IIIB |
| A02K | COAD | Blood | 99,831  | 167,601 | bwa-0.5.9 | Illumina | Harvard | 0 | 0 | 0 | 0 | Not Tested | Cluster3 | NA       | NA  | Ascending Colon  | Stage IV   |
| A02O | COAD | Solid | 152,611 | 64,890  | bwa-0.5.9 | Illumina | Harvard | 0 | 0 | 0 | 0 | MSS        | CIMP.H   | NA       | NO  | Transverse Colon | Stage II   |
| A02R | COAD | Blood | 381,712 | 56,234  | bwa-0.5.9 | Illumina | Harvard | 5 | 3 | 1 | 0 | Not Tested | CIMP.H   | MSI/CIMP | NA  | Cecum            | Stage IIA  |

|      |      |       |           |           |             |          |         |   |   |   |   |       |          |     |    |               |         |
|------|------|-------|-----------|-----------|-------------|----------|---------|---|---|---|---|-------|----------|-----|----|---------------|---------|
| A02W | COAD | Blood | 272,246   | 170,592   | bwa-0.5.9   | Illumina | Harvard | 3 | 2 | 2 | 1 | MSI-L | Cluster4 | CIN | NO | Sigmoid Colon | Stage I |
| A02Y | COAD | Blood | 81,809    | 75,534    | bwa-0.5.9   | Illumina | Harvard | 2 | 2 | 2 | 1 | MSS   | CIMP.L   | NA  | NO | Cecum         | Stage I |
| A03J | COAD | Solid | 191,734   | 77,877    | bwa-0.5.9   | Illumina | Harvard | 2 | 2 | 2 | 1 | MSS   | CIMP.L   | NA  | NO | Sigmoid Colon | Stage I |
| 124  | GBM  | Blood | 735,485   | 3,678,908 | maq-0.7.1   | Illumina | WUGSC   | 0 | 0 | 0 | 0 |       |          |     |    |               |         |
| 145  | GBM  | Blood | 616,095   | 2,531,599 |             | Illumina |         | 1 | 0 | 0 | 0 |       |          |     |    |               |         |
| 152  | GBM  | Blood | 547,708   | 1,351,130 | bwa-0.6.1   | Illumina | BI      | 0 | 0 | 0 | 0 |       |          |     |    |               |         |
| 155  | GBM  | Blood | 248,934   | 997,705   |             | Illumina |         | 1 | 1 | 0 | 0 |       |          |     |    |               |         |
| 185  | GBM  | Blood | 2,495,527 | 438,618   | maq-0.7.1-9 | Illumina | BI      | 0 | 0 | 0 | 0 |       |          |     |    |               |         |
| 188  | GBM  | Blood | 353,330   | 4,094,026 |             | Illumina |         | 0 | 0 | 0 | 0 |       |          |     |    |               |         |
| 208  | GBM  | Blood | 1,007,442 | 3,052,700 | bwa-0.6.1   | Illumina | WUGSC   | 1 | 0 | 0 | 0 |       |          |     |    |               |         |
| 214  | GBM  | Blood | 569,976   | 3,269,556 | bwa-0.6.1   | Illumina | WUGSC   | 0 | 0 | 0 | 0 |       |          |     |    |               |         |
| 648  | GBM  | Blood | 849,233   | 2,505,503 |             | Illumina |         | 0 | 0 | 0 | 0 |       |          |     |    |               |         |
| 686  | GBM  | Blood | 899,363   | 677,474   | maq-0.7.1-9 | Illumina | BI      | 0 | 0 | 0 | 0 |       |          |     |    |               |         |
| 692  | GBM  | Blood | 1,356,559 | 1,382,680 | maq-0.7.1-9 | Illumina | BI      | 1 | 1 | 1 | 0 |       |          |     |    |               |         |
| 742  | GBM  | Blood | 515,275   | 1,027,343 | maq-0.7.1-9 | Illumina | BI      | 2 | 1 | 1 | 0 |       |          |     |    |               |         |
| 744  | GBM  | Blood | 2,070,086 | 2,505,432 | maq-0.7.1-9 | Illumina | BI      | 0 | 0 | 0 | 0 |       |          |     |    |               |         |
| 745  | GBM  | Blood | 1,139,184 | 869,798   | maq-0.7.1-9 | Illumina | BI      | 0 | 0 | 0 | 0 |       |          |     |    |               |         |
| 786  | GBM  | Blood | 442,108   | 889,101   |             | Illumina |         | 1 | 1 | 1 | 0 |       |          |     |    |               |         |
| 821  | GBM  | Blood | 1,868,105 | 1,049,624 | maq-0.7.1-9 | Illumina | BI      | 0 | 0 | 0 | 0 |       |          |     |    |               |         |
| 827  | GBM  | Blood | 6,399,542 | 2,482,402 | maq-0.7.1-9 | Illumina | BI      | 0 | 0 | 0 | 0 |       |          |     |    |               |         |
| 828  | GBM  | Blood | 3,740,829 | 3,356,113 | maq-0.7.1-9 | Illumina | BI      | 0 | 0 | 0 | 0 |       |          |     |    |               |         |
| 846  | GBM  | Blood | 2,911,590 | 308,719   | maq-0.7.1-9 | Illumina | BI      | 0 | 0 | 0 | 0 |       |          |     |    |               |         |
| 861  | GBM  | Blood | 1,915,409 | 390,903   | maq-0.7.1-9 | Illumina | BI      | 0 | 0 | 0 | 0 |       |          |     |    |               |         |
| 877  | GBM  | Blood | 526,398   | 4,234,560 | bwa-0.6.1   | Illumina | WUGSC   | 0 | 0 | 0 | 0 |       |          |     |    |               |         |
| 878  | GBM  | Blood | 856,902   | 1,247,005 | maq-0.7.1-9 | Illumina | BI      | 0 | 0 | 0 | 0 |       |          |     |    |               |         |
| 881  | GBM  | Blood | 1,849,078 | 1,849,078 | bwa-0.6.1   | Illumina | WUGSC   | 0 | 0 | 0 | 0 |       |          |     |    |               |         |
| 882  | GBM  | Blood | 1,736,721 | 539,630   | maq-0.7.1-9 | Illumina | BI      | 0 | 0 | 0 | 0 |       |          |     |    |               |         |
| 1063 | GBM  | Blood | 1,211,202 | 173,109   | bwa-0.5.5   | Illumina | WUGSC   | 0 | 0 | 0 | 0 |       |          |     |    |               |         |
| 1086 | GBM  | Blood | 324,025   | 1,048,922 |             | Illumina |         | 1 | 1 | 1 | 0 |       |          |     |    |               |         |
| 1401 | GBM  | Blood | 487,324   | 3,426,534 |             | Illumina |         | 0 | 0 | 0 | 0 |       |          |     |    |               |         |
| 1438 | GBM  | Blood | 218,731   | 1,869,566 |             | Illumina |         | 0 | 0 | 0 | 0 |       |          |     |    |               |         |

|      |     |       |            |            |             |          |       |   |   |   |   |
|------|-----|-------|------------|------------|-------------|----------|-------|---|---|---|---|
| 1454 | GBM | Blood | 879,776    | 757,931    |             | Illumina |       | 0 | 0 | 0 | 0 |
| 1459 | GBM | Blood | 658,334    | 1,253,705  |             | Illumina |       | 1 | 0 | 0 | 0 |
| 1460 | GBM | Blood | 322,484    | 7,598,177  |             | Illumina |       | 0 | 0 | 0 | 0 |
| 1830 | GBM | Blood | 1,199,840  | 227,564    | maq-0.7.1-9 | Illumina | BI    | 0 | 0 | 0 | 0 |
| 723  | OV  | Blood | 625,804    | 4,007,870  | bwa-0.6.1   | Illumina | WUGSC | 1 | 0 | 0 | 0 |
| 751  | OV  | Blood | 995,290    | 8,655,131  |             | Illumina |       | 1 | 1 | 1 | 0 |
| 886  | OV  | Blood | 3,300,408  | 7,394,468  | maq-0.7.1-9 | Illumina | BI    | 1 | 1 | 1 | 0 |
| 890  | OV  | Blood | 892,872    | 6,483,156  | bwa-0.6.1   | Illumina | WUGSC | 0 | 0 | 0 | 0 |
| 931  | OV  | Solid | 7,181,621  | 9,189,433  | maq-0.7.1-9 | Illumina | BI    | 0 | 0 | 0 | 0 |
| 934  | OV  | Solid | 12,292,397 | 16,522,869 | maq-0.7.1-9 | Illumina | BI    | 0 | 0 | 0 | 0 |
| 970  | OV  | Blood | 2,653,231  | 1,672,579  | maq-0.7.1-9 | Illumina | BI    | 0 | 0 | 0 | 0 |
| 975  | OV  | Blood | 3,968,254  | 1,776,148  | maq-0.7.1-9 | Illumina | BI    | 1 | 1 | 0 | 0 |
| 979  | OV  | Blood | 3,450,254  | 4,195,613  | maq-0.7.1-9 | Illumina | BI    | 1 | 0 | 0 | 0 |
| 980  | OV  | Blood | 1,182,558  | 2,003,830  | bwa-0.6.1   | Illumina | WUGSC | 0 | 0 | 0 | 0 |
| 982  | OV  | Blood | 1,111,850  | 4,549,218  |             | Illumina |       | 0 | 0 | 0 | 0 |
| 1027 | OV  | Blood | 3,336,360  | 4,600,122  | maq-0.7.1-9 | Illumina | BI    | 1 | 1 | 1 | 1 |
| 1103 | OV  | Blood | 2,758,670  | 5,467,896  | bwa-0.6.1   | Illumina | WUGSC | 1 | 1 | 1 | 0 |
| 1122 | OV  | Blood | 3,779,247  | 2,408,549  | maq-0.7.1-9 | Illumina | BI    | 0 | 0 | 0 | 0 |
| 1313 | OV  | Blood | 3,607,159  | 3,227,209  | maq-0.7.1-9 | Illumina | BI    | 0 | 0 | 0 | 0 |
| 1319 | OV  | Blood | 1,529,069  | 4,808,996  |             | Illumina |       | 2 | 1 | 1 | 0 |
| 1320 | OV  | Blood | 2,357,769  | 2,683,044  | maq-0.7.1-9 | Illumina | BI    | 0 | 0 | 0 | 0 |
| 1326 | OV  | Blood | 4,417,521  | 7,733,555  | maq-0.7.1-9 | Illumina | BI    | 1 | 1 | 1 | 0 |
| 1328 | OV  | Blood | 6,281,769  | 4,329,508  | maq-0.7.1-9 | Illumina | BI    | 0 | 0 | 0 | 0 |
| 1329 | OV  | Blood | 4,122,734  | 1,339,973  | maq-0.7.1-9 | Illumina | BI    | 0 | 0 | 0 | 0 |
| 1331 | OV  | Blood | 1,229,285  | 1,274,134  | maq-0.7.1-9 | Illumina | BI    | 4 | 4 | 4 | 0 |
| 1341 | OV  | Blood | 3,376,907  | 1,956,714  | maq-0.7.1-9 | Illumina | BI    | 1 | 1 | 1 | 0 |
| 1342 | OV  | Solid | 2,720,176  | 3,868,275  | maq-0.7.1-9 | Illumina | BI    | 0 | 0 | 0 | 0 |
| 1356 | OV  | Solid | 1,973,456  | 3,003,360  | maq-0.7.1-9 | Illumina | BI    | 0 | 0 | 0 | 0 |
| 1357 | OV  | Solid | 1,993,710  | 3,107,402  | maq-0.7.1-9 | Illumina | BI    | 0 | 0 | 0 | 0 |
| 1371 | OV  | Solid | 2,543,798  | 2,803,608  | bwa-0.6.1   | Illumina | BI    | 0 | 0 | 0 | 0 |
| 1411 | OV  | Blood | 830,522    | 8,423,464  | bwa-0.6.1   | Illumina | WUGSC | 1 | 1 | 1 | 0 |

|      |      |       |         |           |             |          |         |   |   |   |   |            |          |          |     |                   |            |
|------|------|-------|---------|-----------|-------------|----------|---------|---|---|---|---|------------|----------|----------|-----|-------------------|------------|
| 1853 | OV   | Blood | 33,784  | 66,714    | maq-0.7.1-9 | Illumina | BI      | 3 | 1 | 1 | 0 |            |          |          |     |                   |            |
| 2689 | READ | Blood | 192,339 | 365,448   | bwa-0.5.9   | Illumina | Harvard | 3 | 2 | 2 | 1 | MSS        | CIMP.L   | CIN      | NO  | Rectosigmoid Jctn | Stage IV   |
| 2691 | READ | Blood | 147,431 | 646,677   | bwa-0.5.9   | Illumina | Harvard | 0 | 0 | 0 | 0 | MSS        | CIMP.L   | Invasive | NO  | Rectum            | Stage I    |
| 2692 | READ | Blood | 109,187 | 557,574   | bwa-0.5.9   | Illumina | Harvard | 1 | 1 | 1 | 0 | MSS        | Cluster4 | CIN      | NO  | NA                | Stage IIA  |
| 3574 | READ | Blood | 196,810 | 804,305   | bwa-0.5.9   | Illumina | Harvard | 2 | 2 | 1 | 0 | MSS        | Cluster3 | CIN      | NO  | Rectum            | Stage II   |
| 3582 | READ | Blood | 65,609  | 454,831   | bwa-0.5.9   | Illumina | Harvard | 1 | 1 | 1 | 0 | MSS        | Cluster4 | CIN      | NO  | Rectum            | Stage IV   |
| 3727 | READ | Blood | 153,648 | 233,853   | bwa-0.5.9   | Illumina | Harvard | 1 | 1 | 0 | 0 | MSS        | Cluster3 | CIN      | NO  | Rectum            | Stage III  |
| 3728 | READ | Blood | 148,840 | 309,071   | bwa-0.5.9   | Illumina | Harvard | 1 | 0 | 0 | 0 | Not Tested | Cluster4 | MSI/CIMP | NA  | Rectum            | Stage IIIB |
| 3878 | READ | Blood | 252,365 | 114,455   | bwa-0.5.9   | Illumina | Harvard | 3 | 2 | 2 | 0 | MSS        | CIMP.L   | MSI/CIMP | NO  | Rectum            | Stage I    |
| 3881 | READ | Blood | 82,762  | 223,718   | bwa-0.5.9   | Illumina | Harvard | 0 | 0 | 0 | 0 | MSS        | CIMP.L   | MSI/CIMP | NO  | Rectum            | Stage IIA  |
| 3882 | READ | Blood | 77,646  | 219,073   | bwa-0.5.9   | Illumina | Harvard | 3 | 1 | 1 | 0 | MSS        | Cluster4 | CIN      | NO  | Rectum            | Stage I    |
| 3885 | READ | Blood | 86,403  | 202,070   | bwa-0.5.9   | Illumina | Harvard | 2 | 2 | 1 | 0 | Not Tested | CIMP.L   | Invasive | NA  | Rectum            | Stage IIIB |
| 3887 | READ | Blood | 195,402 | 378,819   | bwa-0.5.9   | Illumina | Harvard | 1 | 1 | 1 | 0 | MSS        | Cluster4 | CIN      | NO  | Rectum            | Stage IIA  |
| 3890 | READ | Blood | 74,731  | 575,360   | bwa-0.5.9   | Illumina | Harvard | 1 | 1 | 1 | 1 | MSS        | Cluster3 | CIN      | NO  | Rectum            | Stage I    |
| 3892 | READ | Blood | 194,150 | 488,521   | bwa-0.5.9   | Illumina | Harvard | 0 | 0 | 0 | 0 | MSS        | Cluster4 | Invasive | YES | Rectum            | Stage I    |
| 3893 | READ | Blood | 189,743 | 709,627   | bwa-0.5.9   | Illumina | Harvard | 2 | 1 | 1 | 0 | MSS        | Cluster4 | CIN      | NO  | Rectum            | Stage IIIB |
| 3894 | READ | Blood | 205,805 | 836,827   | bwa-0.5.9   | Illumina | Harvard | 1 | 1 | 1 | 0 | MSS        | Cluster3 | CIN      | NO  | Rectum            | Stage IIA  |
| 3896 | READ | Blood | 200,174 | 613,616   | bwa-0.5.9   | Illumina | Harvard | 2 | 1 | 1 | 1 | MSS        | Cluster3 | CIN      | NO  | Rectum            | Stage I    |
| 3898 | READ | Blood | 75,714  | 228,272   | bwa-0.5.9   | Illumina | Harvard | 3 | 2 | 1 | 0 | MSS        | Cluster3 | CIN      | NO  | Rectum            | Stage IIA  |
| 3902 | READ | Blood | 201,227 | 571,816   | bwa-0.5.9   | Illumina | Harvard | 2 | 1 | 0 | 0 | MSS        | CIMP.L   | MSI/CIMP | NO  | Rectum            | Stage IIA  |
| 3909 | READ | Blood | 296,465 | 585,506   | bwa-0.5.9   | Illumina | Harvard | 1 | 1 | 1 | 1 | MSS        | Cluster3 | CIN      | NO  | Rectum            | Stage IIIB |
| 3913 | READ | Solid | 214,071 | 252,715   | bwa-0.5.9   | Illumina | Harvard | 2 | 2 | 1 | 0 | MSS        | Cluster4 | CIN      | NO  | Rectosigmoid Jctn | Stage IV   |
| 3999 | READ | Blood | 189,195 | 1,033,940 | bwa-0.5.9   | Illumina | Harvard | 3 | 2 | 2 | 2 | MSS        | Cluster3 | CIN      | NO  | Rectum            | Stage IIIC |
| 4001 | READ | Blood | 253,010 | 666,963   | bwa-0.5.9   | Illumina | Harvard | 2 | 1 | 1 | 1 | MSI-L      | Cluster4 | CIN      | NO  | Rectum            | Stage IIA  |
| 4005 | READ | Blood | 103,111 | 407,831   | bwa-0.5.9   | Illumina | Harvard | 1 | 0 | 0 | 0 | MSS        | Cluster3 | CIN      | NO  | Rectum            | Stage IV   |
| 4007 | READ | Blood | 133,301 | 375,788   | bwa-0.5.9   | Illumina | Harvard | 1 | 0 | 0 | 0 | MSI-L      | CIMP.L   | CIN      | NO  | Rectum            | Stage IV   |
| 4008 | READ | Blood | 107,024 | 829,455   | bwa-0.5.9   | Illumina | Harvard | 0 | 0 | 0 | 0 | MSS        | Cluster3 | CIN      | NO  | Rectum            | Stage IIA  |
| 4015 | READ | Blood | 121,772 | 394,662   | bwa-0.5.9   | Illumina | Harvard | 3 | 3 | 3 | 1 | MSS        | Cluster4 | CIN      | NO  | Rectum            | Stage IIA  |
| A002 | READ | Blood | 109,920 | 180,002   | bwa-0.5.9   | Illumina | Harvard | 0 | 0 | 0 | 0 | MSS        | Cluster3 | MSI/CIMP | YES | Rectum            | Stage I    |
| A008 | READ | Blood | 85,766  | 143,303   | bwa-0.5.9   | Illumina | Harvard | 0 | 0 | 0 | 0 | MSS        | Cluster4 | Invasive | NO  | Rectum            | Stage I    |
| A00C | READ | Blood | 120,417 | 166,263   | bwa-0.5.9   | Illumina | Harvard | 1 | 1 | 1 | 1 | MSS        | Cluster3 | Invasive | NO  | Rectum            | Stage IIIB |

|      |      |       |         |         |           |          |         |   |   |   |   |            |          |          |    |        |            |
|------|------|-------|---------|---------|-----------|----------|---------|---|---|---|---|------------|----------|----------|----|--------|------------|
| A00H | READ | Blood | 115,632 | 92,171  | bwa-0.5.9 | Illumina | Harvard | 3 | 2 | 2 | 1 | MSS        | Cluster4 | Invasive | NO | Rectum | Stage IIA  |
| A00Y | READ | Blood | 186,017 | 93,726  | bwa-0.5.9 | Illumina | Harvard | 1 | 1 | 1 | 0 | MSS        | Cluster3 | Invasive | NO | Rectum | Stage IIA  |
| A011 | READ | Blood | 130,704 | 161,785 | bwa-0.5.9 | Illumina | Harvard | 1 | 0 | 0 | 0 | MSS        | CIMP.L   | Invasive | NO | Rectum | Stage IIA  |
| A014 | READ | Blood | 116,655 | 200,986 | bwa-0.5.9 | Illumina | Harvard | 2 | 2 | 2 | 1 | MSS        | Cluster4 | CIN      | NO | Rectum | Stage I    |
| A015 | READ | Blood | 279,064 | 64,840  | bwa-0.5.9 | Illumina | Harvard | 2 | 1 | 1 | 0 | Not Tested | Cluster3 | Invasive | NO | Rectum | Stage I    |
| A016 | READ | Blood | 400,265 | 117,621 | bwa-0.5.9 | Illumina | Harvard | 4 | 2 | 1 | 1 | Not Tested | Cluster3 | CIN      | NO | Rectum | Stage IV   |
| A01J | READ | Blood | 191,669 | 82,362  | bwa-0.5.9 | Illumina | Harvard | 2 | 2 | 2 | 0 | Not Tested | Cluster4 | CIN      | NA | Rectum | Stage IIA  |
| A01L | READ | Blood | 237,214 | 71,236  | bwa-0.5.9 | Illumina | Harvard | 4 | 4 | 2 | 1 | MSS        | Cluster3 | Invasive | NO | Rectum | Stage IIIB |
| A01N | READ | Blood | 148,819 | 83,080  | bwa-0.5.9 | Illumina | Harvard | 0 | 0 | 0 | 0 | Not Tested | Cluster4 | CIN      | NA | Rectum | Stage IV   |
| A01W | READ | Solid | 192,201 | 92,532  | bwa-0.5.9 | Illumina | Harvard | 1 | 0 | 0 | 0 | MSS        | NA       | NA       | NO | Rectum | Stage IIA  |
| A01Y | READ | Solid | 215,695 | 53,081  | bwa-0.5.9 | Illumina | Harvard | 0 | 0 | 0 | 0 | MSS        | NA       | NA       | NO | Rectum | Stage IIA  |
| A020 | READ | Solid | 239,340 | 64,873  | bwa-0.5.9 | Illumina | Harvard | 1 | 1 | 1 | 0 | MSS        | NA       | NA       | NO | Rectum | Stage IIIB |
| A032 | READ | Blood | 171,207 | 98,267  | bwa-0.5.9 | Illumina | Harvard | 0 | 0 | 0 | 0 | MSS        | Cluster4 | CIN      | NO | Rectum | Stage IIIB |

Abbreviations: MSI, microsatellite instability MSS, microsatellite stable; MSI-H, microsatellite instability-high; MSI-L microsatellite instability-low.



## S2. Inherited mtDNA variants and somatic mtDNA mutations found in 226 tumors.

| Tumor | Sample | Region    | Variant type  | aa change | Pos   | Locus    | FI | Score | Ref | Obs | Tumor heteroplasmy | Normal heteroplasmy | $\Delta$ heteroplasmy | MT depth tumor | MT depth normal | MtDB Fr |
|-------|--------|-----------|---------------|-----------|-------|----------|----|-------|-----|-----|--------------------|---------------------|-----------------------|----------------|-----------------|---------|
| COAD  | 2676   | Noncoding | Noncoding SNV |           | 591   | tRNA Phe |    |       | C   | T   | 86.80%             | 0.00%               | 86.80%                | 718            | 329             | 0.00%   |
| COAD  | 3534   | Noncoding | Noncoding SNV |           | 709   | 12S rRNA |    |       | G   | A   | 91.60%             | 0.25%               | 91.35%                | 7,932          | 4,073           | 16.42%  |
| COAD  | 3812   | Noncoding | Noncoding SNV |           | 777   | 12S rRNA |    |       | G   | A   | 58.70%             | 0.00%               | 58.70%                | 1,773          | 447             | 0.00%   |
| READ  | 3896   | Noncoding | Noncoding SNV |           | 777   | 12S rRNA |    |       | G   | A   | 76.40%             | 0.43%               | 75.97%                | 1,370          | 467             | 0.00%   |
| COAD  | 2680   | Noncoding | Noncoding SNV |           | 822   | 12S rRNA |    |       | G   | A   | 16.00%             | 0.00%               | 16.00%                | 1,249          | 533             | 0.00%   |
| OV    | 723    | Noncoding | Noncoding SNV |           | 888   | 12S rRNA |    |       | T   | C   | 90.50%             | 1.00%               | 89.50%                | 7,920          | 3,741           | 0.00%   |
| COAD  | A00Q   | Noncoding | Noncoding SNV |           | 930   | 12S rRNA |    |       | G   | A   | 86.50%             | 0.39%               | 86.11%                | 511            | 760             | 2.26%   |
| READ  | A016   | Noncoding | Noncoding SNV |           | 1,097 | 12S rRNA |    |       | G   | A   | 45.80%             | 0.32%               | 45.48%                | 236            | 943             | 0.00%   |
| GBM   | 742    | Noncoding | Noncoding SNV |           | 1,227 | 12S rRNA |    |       | G   | A   | 72.00%             | 1.32%               | 70.68%                | 1,933          | 2,497           | 0.00%   |
| GBM   | 208    | Noncoding | Noncoding SNV |           | 1,415 | 12S rRNA |    |       | G   | A   | 34.00%             | 0.00%               | 34.00%                | 7,864          | 4,764           | 0.04%   |
| READ  | 3728   | Noncoding | Noncoding SNV |           | 1,420 | 12S rRNA |    |       | T   | C   | 74.90%             | 0.83%               | 74.07%                | 896            | 240             | 0.11%   |
| COAD  | 3970   | Noncoding | Noncoding SNV |           | 1,604 | tRNA Val |    |       | G   | A   | 34.60%             | 0.00%               | 34.60%                | 633            | 207             | 0.00%   |
| COAD  | 4614   | Noncoding | Noncoding SNV |           | 1,604 | tRNA Val |    |       | G   | A   | 91.90%             | 0.47%               | 91.43%                | 371            | 215             | 0.00%   |
| COAD  | 3810   | Noncoding | Noncoding SNV |           | 1,623 | tRNA Val |    |       | G   | A   | 78.80%             | 0.49%               | 78.31%                | 1,417          | 1,014           | 0.00%   |
| READ  | 4007   | Noncoding | Noncoding SNV |           | 1,641 | tRNA Val |    |       | G   | A   | 88.60%             | 0.25%               | 88.35%                | 1,059          | 405             | 0.00%   |
| READ  | A01W   | Noncoding | Noncoding SNV |           | 1,664 | tRNA Val |    |       | G   | C   | 87.20%             | 0.00%               | 87.20%                | 257            | 523             | 0.00%   |
| COAD  | 3807   | Noncoding | Noncoding SNV |           | 1,766 | 16S rRNA |    |       | T   | C   | 28.60%             | 0.65%               | 27.95%                | 1,338          | 1,385           | 0.11%   |
| COAD  | 3808   | Noncoding | Noncoding SNV |           | 1,858 | 16S rRNA |    |       | G   | A   | 69.00%             | 0.15%               | 68.85%                | 1,147          | 1,301           | 0.00%   |
| AML   | 2908   | Noncoding | Noncoding SNV |           | 1,870 | 16S rRNA |    |       | A   | G   | 28.20%             | 0.00%               | 28.20%                | 595            | 97              | 0.00%   |
| GBM   | 1459   | Noncoding | Noncoding SNV |           | 1,966 | 16S rRNA |    |       | G   | A   | 85.10%             | 2.68%               | 82.42%                | 5,904          | 2,405           | 0.00%   |
| READ  | 3878   | Noncoding | Noncoding SNV |           | 1,969 | 16S rRNA |    |       | G   | A   | 65.00%             | 0.32%               | 64.68%                | 671            | 317             | 0.00%   |
| COAD  | 3688   | Noncoding | Noncoding SNV |           | 2,011 | 16S rRNA |    |       | G   | A   | 93.20%             | 0.85%               | 92.35%                | 410            | 118             | 0.00%   |
| COAD  | 2674   | Noncoding | Noncoding SNV |           | 2,177 | 16S rRNA |    |       | T   | C   | 68.70%             | 0.00%               | 68.70%                | 457            | 297             | 0.04%   |
| COAD  | A01P   | Noncoding | Noncoding SNV |           | 2,222 | 16S rRNA |    |       | T   | C   | 51.20%             | 0.25%               | 50.95%                | 295            | 1,210           | 0.04%   |
| READ  | 3898   | Noncoding | Noncoding SNV |           | 2,299 | 16S rRNA |    |       | T   | C   | 74.80%             | 0.00%               | 74.80%                | 781            | 249             | 0.00%   |
| COAD  | A02W   | Noncoding | Noncoding SNV |           | 2,377 | 16S rRNA |    |       | G   | A   | 75.60%             | 0.00%               | 75.60%                | 430            | 759             | 0.00%   |
| COAD  | A010   | Noncoding | Noncoding SNV |           | 2,385 | 16S rRNA |    |       | T   | C   | 17.60%             | 0.00%               | 17.60%                | 335            | 983             | 0.00%   |
| COAD  | 3807   | Noncoding | Noncoding SNV |           | 2,400 | 16S rRNA |    |       | C   | A   | 92.60%             | 0.37%               | 92.23%                | 1,414          | 1,362           | 0.00%   |
| AML   | 2978   | Noncoding | Noncoding SNV |           | 2,669 | 16S rRNA |    |       | A   | T   | 69.20%             | 5.00%               | 64.20%                | 2,515          | 5,962           | 0.00%   |
| READ  | A015   | Noncoding | Noncoding SNV |           | 2,690 | 16S rRNA |    |       | G   | A   | 71.40%             | 0.12%               | 71.28%                | 199            | 867             | 0.00%   |
| COAD  | 3966   | Noncoding | Noncoding SNV |           | 2,700 | 16S rRNA |    |       | G   | A   | 11.90%             | 0.00%               | 11.90%                | 335            | 258             | 0.00%   |
| AML   | 2811   | Noncoding | Noncoding SNV |           | 2,777 | 16S rRNA |    |       | G   | A   | 25.00%             | 4.31%               | 20.69%                | 552            | 1,114           | 0.00%   |
| COAD  | 3548   | Noncoding | Noncoding SNV |           | 2,810 | 16S rRNA |    |       | G   | A   | 89.10%             | 0.00%               | 89.10%                | 994            | 489             | 0.00%   |
| READ  | 3893   | Noncoding | Noncoding SNV |           | 2,831 | 16S rRNA |    |       | G   | A   | 11.50%             | 0.75%               | 10.75%                | 1,962          | 531             | 0.63%   |

|      |      |           |                   |       |       |          |        |       |   |    |        |       |        |       |        |       |
|------|------|-----------|-------------------|-------|-------|----------|--------|-------|---|----|--------|-------|--------|-------|--------|-------|
| READ | 3882 | Noncoding | Noncoding SNV     |       | 2,844 | 16S rRNA |        |       | G | A  | 53.10% | 0.00% | 53.10% | 554   | 82     | 0.00% |
| COAD | 5256 | Noncoding | Noncoding SNV     |       | 2,860 | 16S rRNA |        |       | G | A  | 96.40% | 0.52% | 95.88% | 578   | 384    | 0.00% |
| COAD | 3994 | Noncoding | Noncoding SNV     |       | 3,019 | 16S rRNA |        |       | G | A  | 88.20% | 0.01% | 88.19% | 1,312 | 197    | 0.00% |
| COAD | 3664 | Noncoding | Noncoding SNV     |       | 3,022 | 16S rRNA |        |       | G | A  | 93.50% | 0.00% | 93.50% | 1,270 | 541    | 0.00% |
| GBM  | 145  | Noncoding | Noncoding SNV     |       | 3,036 | 16S rRNA |        |       | G | A  | 43.10% | 0.00% | 43.10% | 7,929 | 3,385  | 0.00% |
| COAD | 5256 | Noncoding | Noncoding SNV     |       | 3,132 | 16S rRNA |        |       | G | A  | 12.30% | 0.21% | 12.09% | 595   | 481    | 0.00% |
| READ | 3902 | Noncoding | Noncoding SNV     |       | 3,179 | 16S rRNA |        |       | G | A  | 32.50% | 0.33% | 32.17% | 1,798 | 601    | 0.00% |
| COAD | 3558 | Noncoding | Noncoding SNV     |       | 3,203 | 16S rRNA |        |       | A | G  | 87.00% | 0.36% | 86.64% | 1,695 | 548    | 0.30% |
| OV   | 751  | Coding    | Nonsynonymous SNV | L8P   | 3,329 | ND1      | medium | 3.065 | T | C  | 95.10% | 1.04% | 94.06% | 7,881 | 2,589  | 0.00% |
| GBM  | 786  | Coding    | Nonsynonymous SNV | I13T  | 3,344 | ND1      | low    | 1.085 | T | C  | 83.10% | 0.00% | 83.10% | 3,869 | 834    | 0.00% |
| COAD | 4315 | Coding    | Nonsynonymous SNV | G36D  | 3,413 | ND1      | high   | 3.83  | G | A  | 59.70% | 0.00% | 59.70% | 762   | 282    | 0.00% |
| COAD | A00N | Coding    | Nonsynonymous SNV | E59K  | 3,481 | ND1      | high   | 3.83  | G | A  | 85.70% | 1.27% | 84.43% | 596   | 864    | 0.00% |
| COAD | 3534 | Coding    | Synonymous SNV    | E59E  | 3,483 | ND1      |        |       | G | A  | 39.60% | 0.29% | 39.31% | 7,909 | 3,817  | 0.15% |
| COAD | A00R | Coding    | Nonsynonymous SNV | A78T  | 3,538 | ND1      | high   | 3.745 | G | A  | 56.00% | 0.12% | 55.88% | 216   | 829    | 0.00% |
| AML  | 2974 | Coding    | Nonsynonymous SNV | A82T  | 3,550 | ND1      | medium | 3.425 | G | A  | 54.00% | 8.00% | 46.00% | 848   | 4,246  | 0.00% |
| READ | A00Y | Coding    | Nonsynonymous SNV | A112P | 3,640 | ND1      | medium | 3.28  | G | C  | 90.60% | 0.00% | 90.60% | 255   | 506    | 0.00% |
| READ | 3887 | Coding    | Nonsynonymous SNV | S152L | 3,761 | ND1      | high   | 3.815 | C | T  | 92.80% | 0.00% | 92.80% | 1,159 | 572    | 0.00% |
| COAD | 3675 | Coding    | Nonsynonymous SNV | G158S | 3,778 | ND1      | high   | 3.83  | G | A  | 95.40% | 0.00% | 95.40% | 1,681 | 716    | 0.00% |
| COAD | 3666 | Coding    | Nonsynonymous SNV | A182T | 3,850 | ND1      | medium | 2.285 | G | A  | 92.20% | 0.28% | 91.92% | 1,098 | 708    | 0.00% |
| READ | 3885 | Coding    | Nonsynonymous SNV | A182T | 3,850 | ND1      | medium | 2.285 | G | A  | 18.90% | 0.00% | 18.90% | 639   | 91     | 0.00% |
| COAD | A02Y | Coding    | Truncating        | W185X | 3,860 | ND1      | high   | 5     | G | A  | 75.40% | 0.00% | 75.40% | 114   | 497    | 0.00% |
| COAD | A02R | Coding    | Synonymous SNV    | W185W | 3,861 | ND1      |        |       | A | G  | 52.30% | 0.21% | 52.09% | 130   | 974    | 0.00% |
| OV   | 886  | Coding    | Nonsynonymous SNV | S188P | 3,868 | ND1      | high   | 3.83  | T | C  | 60.20% | 0.22% | 59.98% | 7,916 | 23,037 | 0.00% |
| OV   | 1319 | Coding    | Nonsynonymous SNV | A191T | 3,877 | ND1      | high   | 3.83  | G | A  | 92.20% | 2.37% | 89.83% | 7,609 | 3,171  | 0.00% |
| AML  | 3009 | Coding    | Synonymous SNV    | E204E | 3,918 | ND1      |        |       | G | A  | 26.10% | 1.00% | 25.10% | 2,833 | 5,750  | 0.55% |
| COAD | 3861 | Coding    | Nonsynonymous SNV | G218D | 3,959 | ND1      | high   | 3.83  | G | A  | 39.80% | 0.80% | 39.00% | 1,705 | 501    | 0.00% |
| AML  | 2996 | Coding    | Nonsynonymous SNV | F270L | 4,114 | ND1      | high   | 3.83  | T | C  | 56.30% | 1.00% | 55.30% | 2,901 | 5,509  | 0.00% |
| COAD | 3534 | Coding    | Nonsynonymous SNV | R281H | 4,148 | ND1      | high   | 3.83  | G | A  | 80.70% | 0.03% | 80.67% | 7,906 | 3,195  | 0.00% |
| READ | A01L | Coding    | Synonymous SNV    | F293F | 4,185 | ND1      |        |       | C | T  | 90.80% | 0.00% | 90.80% | 142   | 529    | 0.11% |
| READ | 4005 | Noncoding | Noncoding SNV     |       | 4,286 | tRNA Ile |        |       | T | C  | 35.40% | 0.33% | 35.07% | 1,162 | 307    | 0.00% |
| COAD | 3861 | Noncoding | Noncoding SNV     |       | 4,309 | tRNA Ile |        |       | G | A  | 21.20% | 0.17% | 21.03% | 2,015 | 587    | 0.00% |
| COAD | A02R | Noncoding | Noncoding indel   |       | 4,318 | tRNA Ile |        |       | C | CC | 76.09% | 0.00% | 76.09% | 92    | 760    | 0.00% |
| COAD | 2679 | Noncoding | Noncoding SNV     |       | 4,431 | tRNA Met |        |       | C | T  | 67.90% | 1.79% | 66.11% | 427   | 112    | 0.00% |
| AML  | 3009 | Coding    | Synonymous SNV    | I1I   | 4,472 | ND2      |        |       | T | C  | 95.40% | 3.00% | 92.40% | 2,771 | 7,345  | 0.00% |
| GBM  | 1086 | Coding    | Nonsynonymous SNV | I98T  | 4,762 | ND2      | medium | 2.645 | T | C  | 44.60% | 0.06% | 44.54% | 5,084 | 1,632  | 0.00% |
| READ | 3582 | Coding    | Nonsynonymous SNV | L128P | 4,852 | ND2      | high   | 3.64  | T | C  | 93.40% | 0.00% | 93.40% | 1,177 | 191    | 0.00% |
| READ | 3878 | Coding    | Nonsynonymous SNV | S140P | 4,887 | ND2      | high   | 3.78  | T | C  | 64.80% | 0.54% | 64.26% | 770   | 368    | 0.00% |
| OV   | 975  | Coding    | Synonymous SNV    | L153L | 4,928 | ND2      |        |       | T | C  | 47.70% | 0.61% | 47.09% | 7,623 | 7,376  | 0.52% |
| OV   | 1411 | Coding    | Nonsynonymous SNV | G165S | 4,962 | ND2      | high   | 3.785 | G | A  | 40.40% | 0.00% | 40.40% | 7,872 | 3,075  | 0.00% |

|      |      |           |                   |       |       |               |         |       |       |    |        |       |        |       |       |       |
|------|------|-----------|-------------------|-------|-------|---------------|---------|-------|-------|----|--------|-------|--------|-------|-------|-------|
| READ | A015 | Coding    | Nonsynonymous SNV | G188E | 5,032 | ND2           | high    | 3.785 | G     | A  | 72.20% | 0.19% | 72.01% | 237   | 1,078 | 0.00% |
| COAD | A00Z | Coding    | Nonsynonymous SNV | S231P | 5,160 | ND2           | high    | 3.705 | T     | C  | 86.50% | 0.31% | 86.19% | 170   | 324   | 0.00% |
| COAD | A01D | Coding    | Nonsynonymous SNV | R232H | 5,164 | ND2           | neutral | 0.455 | G     | A  | 19.20% | 0.27% | 18.93% | 473   | 376   | 0.00% |
| READ | 3999 | Noncoding | Noncoding SNV     |       | 5,623 | tRNA Ala      |         |       | G     | A  | 66.70% | 0.50% | 66.20% | 2,083 | 404   | 0.00% |
| COAD | A00U | Noncoding | Noncoding indel   |       | 5,685 | tRNA Asp      |         |       | CACTT | C  | 59.72% | 0.00% | 59.72% | 144   | 219   | 0.00% |
| READ | A00H | Noncoding | Noncoding SNV     |       | 5,853 | tRNA Tyr      |         |       | T     | C  | 60.60% | 0.00% | 60.60% | 259   | 272   | 0.00% |
| COAD | A02W | Coding    | Nonsynonymous SNV | P107R | 6,223 | CO I          | medium  | 2.86  | C     | G  | 77.00% | 0.00% | 77.00% | 508   | 664   | 0.00% |
| COAD | 3715 | Coding    | Nonsynonymous SNV | G134E | 6,304 | CO I          | medium  | 2.86  | G     | A  | 74.20% | 0.00% | 74.20% | 302   | 106   | 0.00% |
| COAD | 3675 | Coding    | Nonsynonymous SNV | G160E | 6,382 | CO I          | medium  | 2.86  | G     | A  | 50.80% | 0.00% | 50.80% | 1,724 | 734   | 0.00% |
| COAD | 2671 | Coding    | Nonsynonymous SNV | A192T | 6,477 | CO I          | medium  | 2.86  | G     | A  | 27.80% | 0.00% | 27.80% | 1,120 | 365   | 0.00% |
| COAD | 3558 | Coding    | Nonsynonymous SNV | G225E | 6,577 | CO I          | medium  | 2.86  | G     | A  | 85.80% | 0.18% | 85.62% | 1,497 | 557   | 0.00% |
| OV   | 1331 | Coding    | Nonsynonymous SNV | G226E | 6,580 | CO I          | medium  | 2.86  | G     | A  | 50.10% | 0.06% | 50.04% | 7,638 | 8,108 | 0.00% |
| READ | 3898 | Coding    | Nonsynonymous SNV | D227N | 6,582 | CO I          | medium  | 2.86  | G     | A  | 95.00% | 0.00% | 95.00% | 657   | 204   | 0.00% |
| GBM  | 692  | Coding    | Nonsynonymous SNV | G239D | 6,619 | CO I          | medium  | 2.86  | G     | A  | 33.70% | 0.57% | 33.13% | 7,763 | 7,162 | 0.00% |
| READ | 3999 | Coding    | Truncating        |       | 6,692 | CO I          | high    | 5     | AA    | A  | 54.40% | 0.50% | 53.90% | 2,751 | 378   | 0.00% |
| COAD | 4313 | Coding    | Nonsynonymous SNV | E266K | 6,699 | CO I          | medium  | 2.86  | G     | A  | 36.40% | 0.00% | 36.40% | 590   | 172   | 0.00% |
| AML  | 2908 | Coding    | Nonsynonymous SNV | M273V | 6,720 | CO I          | medium  | 2.86  | A     | G  | 32.90% | 0.00% | 32.90% | 642   | 71    | 0.00% |
| OV   | 1103 | Coding    | Nonsynonymous SNV | A289T | 6,768 | CO I          | medium  | 2.86  | G     | A  | 44.70% | 0.00% | 44.70% | 7,888 | 6,726 | 0.00% |
| READ | 4015 | Coding    | Nonsynonymous SNV | S322N | 6,868 | CO I          | medium  | 2.86  | G     | A  | 79.80% | 0.38% | 79.42% | 863   | 266   | 0.00% |
| READ | 2689 | Coding    | Truncating        | W340X | 6,922 | CO I          | high    | 5     | G     | A  | 62.40% | 0.00% | 62.40% | 933   | 501   | 0.00% |
| COAD | 3688 | Coding    | Nonsynonymous SNV | D445N | 7,236 | CO I          | medium  | 2.86  | G     | A  | 24.90% | 0.00% | 24.90% | 386   | 140   | 0.00% |
| AML  | 2811 | Coding    | Nonsynonymous SNV | G457S | 7,272 | CO I          | medium  | 2.86  | G     | A  | 55.50% | 0.18% | 55.32% | 445   | 553   | 0.00% |
| COAD | 3516 | Coding    | Nonsynonymous SNV | V482I | 7,347 | CO I          | low     | 1.87  | G     | A  | 21.80% | 0.37% | 21.43% | 616   | 268   | 0.04% |
| COAD | A02Y | Coding    | Nonsynonymous SNV | E493K | 7,380 | CO I          | high    | 3.865 | G     | A  | 80.60% | 0.00% | 80.60% | 83    | 122   | 0.00% |
| AML  | 3009 | Coding    | Nonsynonymous SNV | V509L | 7,428 | CO I          | medium  | 3.11  | G     | T  | 41.50% | 2.00% | 39.50% | 2,192 | 5,329 | 0.00% |
| COAD | 3555 | Noncoding | Noncoding indel   |       | 7,466 | tRNA Ser1     |         |       | C     | CC | 77.02% | 0.00% | 77.02% | 161   | 305   | 0.00% |
| COAD | 4750 | Noncoding | Noncoding indel   |       | 7,466 | tRNA Ser1     |         |       | C     | CC | 94.47% | 0.00% | 94.47% | 868   | 171   | 0.00% |
| COAD | 4951 | Noncoding | Noncoding SNV     |       | 7,486 | tRNA Ser1     |         |       | G     | A  | 46.00% | 0.64% | 45.36% | 1,334 | 311   | 0.00% |
| COAD | A00Z | Noncoding | Noncoding SNV     |       | 7,552 | tRNA Asp Acid |         |       | A     | G  | 20.90% | 0.00% | 20.90% | 196   | 359   | 0.00% |
| AML  | 2939 | Coding    | Synonymous SNV    | F23F  | 7,654 | CO II         |         |       | T     | C  | 31.40% | 0.60% | 30.80% | 605   | 4,015 | 0.00% |
| AML  | 2955 | Coding    | Nonsynonymous SNV | D112N | 7,919 | CO II         | medium  | 3.1   | G     | A  | 36.70% | 5.32% | 31.38% | 166   | 263   | 0.00% |
| READ | A00H | Coding    | Nonsynonymous SNV | G114S | 7,925 | CO II         | medium  | 2.645 | G     | A  | 47.20% | 0.00% | 47.20% | 286   | 329   | 0.00% |
| COAD | 4748 | Coding    | Nonsynonymous SNV | G131S | 7,976 | CO II         | medium  | 3.45  | G     | A  | 87.20% | 0.00% | 87.20% | 1,535 | 229   | 0.00% |
| READ | 3894 | Coding    | Nonsynonymous SNV | R134Q | 7,986 | CO II         | medium  | 3.445 | G     | A  | 72.50% | 0.00% | 72.50% | 2,262 | 479   | 0.00% |
| READ | A016 | Coding    | Synonymous SNV    | G222G | 8,251 | CO II         |         |       | G     | A  | 40.70% | 0.12% | 40.58% | 209   | 846   | 5.29% |
| READ | 3913 | Coding    | Synonymous SNV    | N62N  | 8,712 | ATPase6       |         |       | C     | T  | 89.00% | 0.14% | 88.86% | 833   | 706   | 0.00% |
| READ | A014 | Coding    | Nonsynonymous SNV | F78L  | 8,758 | ATPase6       | high    | 3.64  | T     | C  | 95.50% | 0.19% | 95.31% | 286   | 515   | 0.00% |
| COAD | 3715 | Coding    | Synonymous SNV    | A80A  | 8,766 | ATPase6       |         |       | C     | T  | 58.00% | 0.00% | 58.00% | 274   | 116   | 0.04% |
| COAD | 2676 | Coding    | Nonsynonymous SNV | A162T | 9,010 | ATPase6       | high    | 3.675 | G     | A  | 89.70% | 0.30% | 89.40% | 668   | 330   | 0.00% |

|      |      |           |                     |       |        |          |        |       |   |      |        |       |        |       |        |       |
|------|------|-----------|---------------------|-------|--------|----------|--------|-------|---|------|--------|-------|--------|-------|--------|-------|
| COAD | A02R | Coding    | Synonymous SNV      | S176S | 9,054  | ATPase6  |        |       | C | T    | 40.80% | 0.06% | 40.74% | 211   | 1,351  | 0.07% |
| READ | 3893 | Coding    | Nonsynonymous SNV   | S219N | 9,182  | ATPase6  | high   | 3.675 | G | A    | 83.20% | 0.00% | 83.20% | 1,951 | 546    | 0.15% |
| OV   | 1341 | Coding    | Nonsynonymous SNV   | L220P | 9,185  | ATPase6  | high   | 3.675 | T | C    | 92.80% | 0.19% | 92.61% | 7,899 | 12,381 | 0.00% |
| READ | A01L | Coding    | Synonymous SNV      | M1M   | 9,209  | CO III   |        |       | G | A    | 93.50% | 0.64% | 92.86% | 216   | 625    | 0.00% |
| COAD | 2679 | Coding    | Truncating          | W16X  | 9,253  | CO III   | high   | 5     | G | A    | 82.10% | 0.00% | 82.10% | 565   | 132    | 0.00% |
| AML  | 2842 | Coding    | Nonsynonymous SNV   | T28A  | 9,288  | CO III   | medium | 3.285 | A | G    | 85.60% | 0.00% | 85.60% | 236   | 88     | 0.07% |
| COAD | 3555 | Coding    | Nonsynonymous SNV   | R63W  | 9,393  | CO III   | high   | 3.84  | C | T    | 82.40% | 0.00% | 82.40% | 193   | 302    | 0.00% |
| COAD | 2683 | Coding    | Nonsynonymous SNV   | E64K  | 9,396  | CO III   | high   | 3.84  | G | A    | 94.90% | 0.00% | 94.90% | 920   | 208    | 0.00% |
| GBM  | 742  | Coding    | Nonsynonymous SNV   | S150N | 9,655  | CO III   | high   | 3.835 | G | A    | 73.80% | 0.31% | 73.49% | 3,056 | 3,836  | 0.00% |
| COAD | 3715 | Coding    | Nonsynonymous SNV   | S150N | 9,655  | CO III   | high   | 3.835 | G | A    | 70.70% | 0.00% | 70.70% | 352   | 114    | 0.00% |
| COAD | 2672 | Coding    | Nonsynonymous SNV   | E153K | 9,663  | CO III   | high   | 3.82  | G | A    | 81.30% | 8.01% | 73.29% | 418   | 362    | 0.00% |
| COAD | 4746 | Coding    | Nontruncating indel |       | 9,756  | CO III   |        |       | T | TCTC | 85.25% | 0.00% | 85.25% | 868   | 180    | 0.00% |
| COAD | 4748 | Coding    | Nonsynonymous SNV   | G211D | 9,838  | CO III   | high   | 3.84  | G | A    | 83.30% | 0.00% | 83.30% | 1,757 | 291    | 0.00% |
| COAD | 2683 | Coding    | Synonymous SNV      | A237A | 9,917  | CO III   |        |       | C | T    | 96.50% | 0.29% | 96.21% | 1,761 | 341    | 0.00% |
| COAD | 2672 | Coding    | Nonsynonymous SNV   | V248I | 9,948  | CO III   | medium | 3.49  | G | A    | 78.50% | 0.26% | 78.24% | 400   | 385    | 0.18% |
| AML  | 2939 | Coding    | Nonsynonymous SNV   | V254A | 9,967  | CO III   | high   | 3.795 | T | C    | 69.30% | 1.41% | 67.89% | 349   | 2,344  | 0.00% |
| COAD | A01Q | Noncoding | Noncoding SNV       |       | 10,000 | tRNA Gly |        |       | G | A    | 16.20% | 0.09% | 16.11% | 686   | 1,121  | 0.00% |
| AML  | 2983 | Noncoding | Noncoding SNV       |       | 10,015 | tRNA Gly |        |       | T | C    | 85.10% | 3.00% | 82.10% | 4,739 | 13,177 | 0.00% |
| READ | A011 | Noncoding | Noncoding SNV       |       | 10,031 | tRNA Gly |        |       | T | C    | 19.70% | 0.23% | 19.47% | 608   | 436    | 0.22% |
| READ | 3878 | Coding    | Nonsynonymous SNV   | A47T  | 10,197 | ND3      | high   | 4.005 | G | A    | 63.30% | 0.36% | 62.94% | 596   | 274    | 0.07% |
| COAD | 3715 | Coding    | Nonsynonymous SNV   | S101N | 10,360 | ND3      | high   | 3.615 | G | A    | 74.10% | 0.00% | 74.10% | 386   | 135    | 0.00% |
| OV   | 979  | Noncoding | Noncoding SNV       |       | 10,408 | tRNA Arg |        |       | T | C    | 24.60% | 0.11% | 24.49% | 991   | 896    | 0.00% |
| READ | 4001 | Noncoding | Noncoding SNV       |       | 10,412 | tRNA Arg |        |       | T | C    | 66.90% | 0.22% | 66.68% | 2,329 | 901    | 0.00% |
| OV   | 1853 | Noncoding | Noncoding SNV       |       | 10,464 | tRNA Arg |        |       | T | C    | 82.60% | 0.00% | 82.60% | 23    | 73     | 0.00% |
| COAD | 3509 | Coding    | Truncating          |       | 10,562 | ND4L     | high   | 5     | A | AT   | 16.96% | 0.00% | 16.96% | 572   | 291    | 0.00% |
| READ | 3574 | Coding    | Nonsynonymous SNV   | E34K  | 10,569 | ND4L     | medium | 3.365 | G | A    | 96.20% | 0.16% | 96.04% | 2,420 | 626    | 0.00% |
| COAD | 4744 | Coding    | Nonsynonymous SNV   | M36T  | 10,576 | ND4L     | high   | 3.77  | T | C    | 38.80% | 0.00% | 38.80% | 971   | 233    | 0.00% |
| GBM  | 155  | Coding    | Synonymous SNV      | S39S  | 10,586 | ND4L     |        |       | G | A    | 30.20% | 0.00% | 30.20% | 4,895 | 3,467  | 1.29% |
| READ | 3727 | Coding    | Synonymous SNV      | A72A  | 10,685 | ND4L     |        |       | G | A    | 91.60% | 0.93% | 90.67% | 664   | 107    | 0.81% |
| AML  | 3009 | Coding    | Nonsynonymous SNV   | S82F  | 10,714 | ND4L     | high   | 4.12  | C | T    | 26.80% | 0.00% | 26.80% | 1,904 | 7,574  | 0.00% |
| COAD | 4071 | Coding    | Nonsynonymous SNV   | D88N  | 10,731 | ND4L     | medium | 3.22  | G | A    | 12.97% | 0.00% | 12.97% | 699   | 111    | 0.00% |
| OV   | 1331 | Coding    | Nonsynonymous SNV   | I34T  | 10,860 | ND4      | medium | 3.23  | T | C    | 38.80% | 0.07% | 38.73% | 5,954 | 6,686  | 0.00% |
| READ | 3913 | Coding    | Nonsynonymous SNV   | S35T  | 10,863 | ND4      | medium | 3     | G | C    | 93.20% | 0.30% | 92.90% | 793   | 657    | 0.00% |
| COAD | 3968 | Coding    | Nonsynonymous SNV   | F50S  | 10,908 | ND4      | low    | 0.935 | T | C    | 90.30% | 0.00% | 90.30% | 1,018 | 184    | 0.00% |
| READ | A00C | Coding    | Truncating          |       | 10,947 | ND4      | high   | 5     | C | CC   | 31.21% | 0.00% | 31.21% | 330   | 273    | 0.00% |
| COAD | 3715 | Coding    | Nonsynonymous SNV   | I104T | 11,070 | ND4      | low    | 1.49  | T | C    | 58.90% | 0.00% | 58.90% | 377   | 166    | 0.00% |
| COAD | A01T | Coding    | Nonsynonymous SNV   | Y119C | 11,115 | ND4      | medium | 3.405 | A | G    | 31.50% | 0.08% | 31.42% | 486   | 1,219  | 0.00% |
| READ | 2692 | Coding    | Nonsynonymous SNV   | E123K | 11,126 | ND4      | medium | 3.405 | G | A    | 21.80% | 0.00% | 21.80% | 1,711 | 342    | 0.00% |
| COAD | 4752 | Coding    | Nonsynonymous SNV   | M229T | 11,445 | ND4      | medium | 3.4   | T | C    | 75.30% | 0.00% | 75.30% | 1,112 | 311    | 0.00% |

|      |      |        |                   |       |        |     |         |       |    |             |        |       |        |       |        |       |
|------|------|--------|-------------------|-------|--------|-----|---------|-------|----|-------------|--------|-------|--------|-------|--------|-------|
| COAD | A03J | Coding | Nonsynonymous SNV | A233T | 11,456 | ND4 | medium  | 3.4   | G  | A           | 46.10% | 0.29% | 45.81% | 271   | 684    | 0.00% |
| COAD | A01I | Coding | Nonsynonymous SNV | G311S | 11,690 | ND4 | medium  | 3.405 | G  | A           | 15.70% | 1.01% | 14.69% | 814   | 595    | 0.00% |
| READ | A01L | Coding | Nonsynonymous SNV | I314T | 11,700 | ND4 | neutral | 0.1   | T  | C           | 43.30% | 0.13% | 43.17% | 203   | 754    | 0.00% |
| READ | A01J | Coding | Nonsynonymous SNV | L315P | 11,703 | ND4 | medium  | 3.405 | T  | C           | 48.90% | 0.00% | 48.90% | 262   | 462    | 0.00% |
| AML  | 2819 | Coding | Synonymous SNV    | T350T | 11,809 | ND4 |         |       | T  | C           | 94.40% | 1.19% | 93.21% | 465   | 759    | 0.00% |
| COAD | A01T | Coding | Nonsynonymous SNV | A356T | 11,825 | ND4 | medium  | 2.315 | G  | A           | 30.80% | 0.22% | 30.58% | 441   | 1,367  | 0.00% |
| COAD | 3693 | Coding | Truncating        |       | 11,867 | ND4 | high    | 5     | C  | CC          | 94.76% | 0.42% | 94.34% | 782   | 240    | 0.00% |
| COAD | A00Z | Coding | Truncating        |       | 11,867 | ND4 | high    | 5     | C  | CC/CCC/CCCC | 77.12% | 0.00% | 77.12% | 118   | 329    | 0.00% |
| READ | A014 | Coding | Truncating        |       | 11,867 | ND4 | high    | 5     | C  | CC          | 95.58% | 0.17% | 95.41% | 294   | 606    | 0.00% |
| COAD | A02W | Coding | Truncating        |       | 11,867 | ND4 | high    | 5     | C  | CC          | 60.42% | 0.00% | 60.42% | 379   | 580    | 0.00% |
| AML  | 2970 | Coding | Nonsynonymous SNV | L398P | 11,952 | ND4 | medium  | 3.355 | T  | C           | 41.00% | 7.00% | 34.00% | 459   | 10,052 | 0.00% |
| COAD | 3715 | Coding | Nonsynonymous SNV | T413M | 11,997 | ND4 | low     | 1.63  | C  | T           | 52.40% | 0.00% | 52.40% | 382   | 132    | 0.00% |
| READ | 3882 | Coding | Nonsynonymous SNV | I453T | 12,117 | ND4 | medium  | 2.165 | T  | C           | 92.20% | 0.00% | 92.20% | 972   | 111    | 0.00% |
| COAD | 2672 | Coding | Synonymous SNV    | G456G | 12,127 | ND4 |         |       | G  | A           | 37.40% | 0.00% | 37.40% | 559   | 450    | 0.18% |
| READ | 3885 | Coding | Synonymous SNV    | M3M   | 12,345 | ND5 |         |       | G  | A           | 88.70% | 0.00% | 88.70% | 638   | 100    | 0.00% |
| COAD | 5256 | Coding | Synonymous SNV    | M3M   | 12,345 | ND5 |         |       | G  | A           | 95.70% | 0.00% | 95.70% | 629   | 460    | 0.00% |
| READ | 3574 | Coding | Synonymous SNV    | L12L  | 12,370 | ND5 |         |       | C  | T           | 13.40% | 0.15% | 13.25% | 2,663 | 662    | 0.07% |
| READ | 4001 | Coding | Truncating        |       | 12,385 | ND5 | high    | 5     | C  | CC          | 79.73% | 0.00% | 79.73% | 1,628 | 621    | 0.00% |
| COAD | 4684 | Coding | Truncating        |       | 12,385 | ND5 | high    | 5     | C  | CC          | 83.27% | 0.00% | 83.27% | 1,076 | 308    | 0.00% |
| OV   | 1853 | Coding | Nonsynonymous SNV | V24I  | 12,406 | ND5 | neutral | -0.71 | G  | A           | 74.10% | 0.00% | 74.10% | 54    | 88     | 2.03% |
| OV   | 1027 | Coding | Truncating        |       | 12,418 | ND5 | high    | 5     | AA | A           | 35.58% | 0.68% | 34.90% | 3,381 | 6,210  | 0.00% |
| AML  | 2967 | Coding | Truncating        |       | 12,418 | ND5 | high    | 5     | AA | A           | 46.02% | 4.41% | 41.60% | 3477  | 6843   | 0.00% |
| AML  | 3009 | Coding | Truncating        |       | 12,418 | ND5 | high    | 5     | A  | AA          | 44.33% | 1.21% | 43.12% | 9422  | 6750   | 0.00% |
| COAD | 3548 | Coding | Truncating        |       | 12,418 | ND5 | high    | 5     | A  | AA          | 49.42% | 0.80% | 48.63% | 692   | 377    | 0.00% |
| COAD | 3553 | Coding | Truncating        |       | 12,418 | ND5 | high    | 5     | A  | AA          | 85.34% | 1.41% | 83.93% | 457   | 497    | 0.00% |
| COAD | 3666 | Coding | Truncating        |       | 12,418 | ND5 | high    | 5     | AA | A           | 94.38% | 1.37% | 93.01% | 960   | 511    | 0.00% |
| COAD | 3810 | Coding | Truncating        |       | 12,418 | ND5 | high    | 5     | A  | AA          | 81.07% | 0.69% | 80.38% | 1009  | 725    | 0.00% |
| READ | 3896 | Coding | Truncating        |       | 12,418 | ND5 | high    | 5     | A  | AA          | 61.08% | 0.41% | 60.67% | 1421  | 488    | 0.00% |
| READ | 3909 | Coding | Truncating        |       | 12,418 | ND5 | high    | 5     | A  | AA          | 76.69% | 0.70% | 76.00% | 1373  | 717    | 0.00% |
| COAD | 3970 | Coding | Truncating        |       | 12,418 | ND5 | high    | 5     | A  | AA          | 40.33% | 0.58% | 39.75% | 543   | 171    | 0.00% |
| READ | 4015 | Coding | Truncating        |       | 12,418 | ND5 | high    | 5     | A  | AA          | 84.69% | 1.02% | 83.68% | 967   | 295    | 0.00% |
| COAD | 4071 | Coding | Truncating        |       | 12,418 | ND5 | high    | 5     | A  | AA          | 84.91% | 1.22% | 83.69% | 477   | 82     | 0.00% |
| COAD | 4308 | Coding | Truncating        |       | 12,418 | ND5 | high    | 5     | A  | AA          | 73.19% | 0.38% | 72.81% | 1794  | 265    | 0.00% |
| COAD | 4315 | Coding | Truncating        |       | 12,418 | ND5 | high    | 5     | A  | AA          | 74.54% | 0.00% | 74.54% | 766   | 373    | 0.00% |
| COAD | 4682 | Coding | Truncating        |       | 12,418 | ND5 | high    | 5     | A  | AA          | 78.78% | 0.64% | 78.14% | 1659  | 156    | 0.00% |
| COAD | 4746 | Coding | Truncating        |       | 12,418 | ND5 | high    | 5     | A  | AA          | 84.04% | 0.00% | 84.04% | 1291  | 193    | 0.00% |
| COAD | 4747 | Coding | Truncating        |       | 12,418 | ND5 | high    | 5     | A  | AA          | 47.26% | 0.14% | 47.12% | 1860  | 734    | 0.00% |
| READ | 3902 | Coding | Synonymous SNV    | Y120Y | 12,696 | ND5 |         |       | T  | C           | 45.80% | 0.16% | 45.64% | 2,001 | 629    | 0.30% |
| COAD | 3693 | Coding | Truncating        | G148X | 12,778 | ND5 | high    | 5     | G  | A           | 86.60% | 0.00% | 86.60% | 1,089 | 312    | 0.00% |

|      |      |           |                   |       |        |          |        |       |    |    |        |       |        |       |        |       |
|------|------|-----------|-------------------|-------|--------|----------|--------|-------|----|----|--------|-------|--------|-------|--------|-------|
| OV   | 1331 | Coding    | Nonsynonymous SNV | A236T | 13,042 | ND5      | medium | 2.835 | G  | A  | 33.50% | 0.25% | 33.25% | 2,641 | 3,158  | 0.04% |
| COAD | A01G | Coding    | Nonsynonymous SNV | A236T | 13,042 | ND5      | medium | 2.835 | G  | A  | 72.80% | 0.15% | 72.65% | 331   | 2,026  | 0.04% |
| COAD | 3970 | Coding    | Nonsynonymous SNV | V243I | 13,063 | ND5      | medium | 2.835 | G  | A  | 82.50% | 0.00% | 82.50% | 773   | 208    | 0.00% |
| COAD | 3966 | Coding    | Nonsynonymous SNV | A245T | 13,069 | ND5      | medium | 2.835 | G  | A  | 77.70% | 0.00% | 77.70% | 341   | 285    | 0.00% |
| OV   | 1326 | Coding    | Nonsynonymous SNV | G281S | 13,177 | ND5      | medium | 2.835 | G  | A  | 44.00% | 0.08% | 43.92% | 7,294 | 14,130 | 0.00% |
| COAD | A00W | Coding    | Truncating        |       | 13,231 | ND5      | high   | 5     | A  | AA | 12.95% | 0.00% | 12.95% | 332   | 323    | 0.00% |
| COAD | A00W | Coding    | Nonsynonymous SNV | L368P | 13,439 | ND5      | medium | 2.55  | T  | C  | 75.60% | 0.19% | 75.41% | 532   | 540    | 0.00% |
| READ | 4015 | Coding    | Nonsynonymous SNV | S423N | 13,604 | ND5      | high   | 3.6   | G  | A  | 92.20% | 0.30% | 91.90% | 1,066 | 331    | 0.00% |
| READ | 2689 | Coding    | Nonsynonymous SNV | G433S | 13,633 | ND5      | medium | 3.185 | G  | A  | 16.40% | 0.19% | 16.21% | 1,028 | 526    | 0.00% |
| READ | 3890 | Coding    | Truncating        | G460X | 13,714 | ND5      | high   | 5     | G  | A  | 30.50% | 0.00% | 30.50% | 1,632 | 236    | 0.00% |
| COAD | A01D | Coding    | Nonsynonymous SNV | A464T | 13,726 | ND5      | medium | 2.4   | G  | A  | 81.90% | 0.25% | 81.65% | 487   | 394    | 0.00% |
| COAD | 3715 | Coding    | Truncating        |       | 13,754 | ND5      | high   | 5     | CC | C  | 59.46% | 0.56% | 58.90% | 222   | 178    | 0.00% |
| READ | A016 | Coding    | Truncating        |       | 13,763 | ND5      | high   | 5     | C  | CC | 93.25% | 0.00% | 93.25% | 237   | 902    | 0.00% |
| COAD | 3968 | Coding    | Nonsynonymous SNV | S515Y | 13,880 | ND5      | low    | 0.87  | C  | A  | 81.80% | 0.80% | 81.00% | 1,220 | 251    | 0.74% |
| COAD | A03J | Coding    | Truncating        | G527X | 13,915 | ND5      | high   | 5     | G  | A  | 77.00% | 0.00% | 77.00% | 335   | 889    | 0.00% |
| COAD | 2683 | Coding    | Synonymous SNV    | M583M | 14,085 | ND5      |        |       | A  | G  | 96.90% | 0.00% | 96.90% | 1,996 | 364    | 0.00% |
| COAD | 3688 | Coding    | Nonsynonymous SNV | T598I | 14,129 | ND5      | low    | 0.895 | C  | T  | 12.10% | 0.00% | 12.10% | 536   | 137    | 0.15% |
| READ | 3898 | Coding    | Synonymous SNV    | V88V  | 14,410 | ND6      |        |       | G  | A  | 94.20% | 0.40% | 93.80% | 671   | 235    | 0.00% |
| OV   | 1331 | Coding    | Nonsynonymous SNV | M64V  | 14,484 | ND6      | high   | 4.13  | T  | C  | 78.10% | 0.31% | 77.79% | 1,578 | 1,616  | 0.26% |
| AML  | 2996 | Coding    | Nonsynonymous SNV | I58V  | 14,502 | ND6      | low    | 1.405 | T  | C  | 57.30% | 1.00% | 56.30% | 2,320 | 10,289 | 0.48% |
| READ | 3999 | Coding    | Truncating        |       | 14,504 | ND6      | high   | 5     | AA | A  | 16.40% | 0.00% | 16.40% | 2,519 | 409    | 0.00% |
| COAD | A01I | Coding    | Truncating        |       | 14,504 | ND6      | high   | 5     | AA | A  | 96.17% | 0.18% | 95.99% | 496   | 551    | 0.00% |
| READ | A01J | Coding    | Nonsynonymous SNV | R5H   | 14,760 | Cyt b    | medium | 2.68  | G  | A  | 47.50% | 0.00% | 47.50% | 255   | 597    | 0.00% |
| COAD | 2676 | Coding    | Nonsynonymous SNV | L10M  | 14,774 | Cyt b    | medium | 2.69  | C  | A  | 11.10% | 0.34% | 10.76% | 737   | 298    | 0.00% |
| AML  | 2978 | Coding    | Nonsynonymous SNV | G34D  | 14,847 | Cyt b    | low    | 1.73  | G  | A  | 25.00% | 1.00% | 24.00% | 1,628 | 5,975  | 0.00% |
| COAD | A01R | Coding    | Nonsynonymous SNV | C40Y  | 14,865 | Cyt b    | low    | 1.73  | G  | A  | 78.70% | 0.21% | 78.49% | 244   | 939    | 0.00% |
| COAD | 4684 | Coding    | Nonsynonymous SNV | A52T  | 14,900 | Cyt b    | low    | 1.73  | G  | A  | 88.90% | 0.00% | 88.90% | 1,214 | 320    | 0.00% |
| COAD | A02R | Coding    | Nonsynonymous SNV | C93Y  | 15,024 | Cyt b    | low    | 1.73  | G  | A  | 68.70% | 0.09% | 68.61% | 182   | 1,149  | 0.04% |
| COAD | 3968 | Coding    | Nonsynonymous SNV | A125P | 15,119 | Cyt b    | low    | 1.7   | G  | C  | 28.70% | 1.30% | 27.40% | 1,253 | 230    | 0.00% |
| READ | A00H | Coding    | Truncating        | G166X | 15,242 | Cyt b    | high   | 5     | G  | A  | 75.10% | 0.00% | 75.10% | 362   | 396    | 0.00% |
| COAD | 4071 | Coding    | Nonsynonymous SNV | V170M | 15,254 | Cyt b    | low    | 1.73  | G  | A  | 89.00% | 0.00% | 89.00% | 626   | 89     | 0.00% |
| COAD | 3666 | Coding    | Nonsynonymous SNV | G210E | 15,375 | Cyt b    | high   | 3.775 | G  | A  | 42.90% | 0.12% | 42.78% | 1,152 | 803    | 0.00% |
| COAD | 3861 | Coding    | Nonsynonymous SNV | R282Q | 15,591 | Cyt b    | low    | 1.845 | G  | A  | 78.60% | 0.75% | 77.85% | 2,004 | 665    | 0.00% |
| READ | A01L | Coding    | Truncating        |       | 15,594 | Cyt b    | high   | 5     | CC | C  | 42.94% | 0.00% | 42.94% | 163   | 548    | 0.00% |
| READ | A020 | Coding    | Nonsynonymous SNV | F317L | 15,695 | Cyt b    | low    | 1.845 | T  | C  | 87.40% | 0.00% | 87.40% | 223   | 841    | 0.00% |
| READ | 3882 | Noncoding | Noncoding SNV     |       | 15,897 | tRNA Thr |        |       | G  | A  | 93.50% | 0.00% | 93.50% | 650   | 104    | 0.00% |
| COAD | 3994 | Noncoding | Noncoding SNV     |       | 15,926 | tRNA Thr |        |       | C  | T  | 88.40% | 0.01% | 88.39% | 1,488 | 328    | 0.00% |
| READ | 2689 | Noncoding | Noncoding SNV     |       | 15,967 | tRNA Pro |        |       | G  | A  | 21.12% | 0.31% | 20.82% | 913   | 654    | 0.00% |
| OV   | 1853 | Noncoding | Noncoding SNV     |       | 15,995 | tRNA Pro |        |       | G  | A  | 37.70% | 0.00% | 37.70% | 53    | 103    | 0.00% |

|      |      |           |               |        |        |   |   |        |       |        |       |       |       |
|------|------|-----------|---------------|--------|--------|---|---|--------|-------|--------|-------|-------|-------|
| COAD | A02R | Noncoding | Noncoding SNV | 16,390 | D-loop | G | A | 77.50% | 0.13% | 77.37% | 178   | 1,567 | 3.32% |
| READ | A016 | Noncoding | Noncoding SNV | 16,399 | D-loop | A | G | 93.60% | 0.80% | 92.80% | 280   | 1,244 | 2.04% |
| OV   | 1319 | Noncoding | Noncoding SNV | 16,465 | D-loop | C | T | 95.70% | 0.00% | 95.70% | 5,707 | 4,443 | 0.21% |
| COAD | 4748 | Noncoding | Noncoding SNV | 16,497 | D-loop | A | G | 23.20% | 0.68% | 22.52% | 790   | 294   | 1.93% |

---

Abbreviations: Pos, nucleotide position in mitochondrial genome (hg19); FI, functional impact predicted by

MutationAssessor; Score, functional impact score generated by MutationAssessor, MtDB Fr, frequency of reported variant in

MtDB; ND, NADH dehydrogenase; CO, cytochrome c oxidase; ATPase, ATP synthase

**S3. Summary of tumor counts harboring various categories of somatic mutations.**

| <b>Tumor type</b> | <b># Pairs</b> | <b># Tumors with Nonsyn only</b> | <b># Tumors with Syn only</b> | <b># Tumors with Nonsyn + Syn</b> | <b># Tumors w/o coding somatic mutations</b> | <b># Tumors with coding mutations alone</b> | <b># Tumors w/o any somatic mutations</b> |
|-------------------|----------------|----------------------------------|-------------------------------|-----------------------------------|----------------------------------------------|---------------------------------------------|-------------------------------------------|
| COAD              | 86             | 40                               | 1                             | 6                                 | 39                                           | 31                                          | 24                                        |
| READ              | 43             | 21                               | 2                             | 6                                 | 14                                           | 17                                          | 9                                         |
| OV                | 28             | 10                               | 1                             | 0                                 | 17                                           | 9                                           | 15                                        |
| AML               | 37             | 9                                | 1                             | 2                                 | 25                                           | 9                                           | 24                                        |
| GBM               | 32             | 4                                | 1                             | 0                                 | 27                                           | 4                                           | 24                                        |
| <b>Combined</b>   | <b>226</b>     | <b>84</b>                        | <b>6</b>                      | <b>14</b>                         | <b>122</b>                                   | <b>70</b>                                   | <b>96</b>                                 |

Abbreviations: Nonsyn, nonsynonymous mutation; Syn, synonymous mutation; w/o, without



#### S4. Somatic truncating mutations.

| Tumor | Sample | Pos    | Locus  | Ref | Obs         | Homopolymer tract | MSI status | Tumor heteroplasmy | Normal heteroplasmy | Δ heteroplasmy |
|-------|--------|--------|--------|-----|-------------|-------------------|------------|--------------------|---------------------|----------------|
| COAD  | A02Y   | 3,860  | ND1    | G   | A           |                   | MSS        | 75.40%             | 0.00%               | 75.40%         |
| READ  | 3999   | 6,692  | CO I   | AA  | A           | A7                | MSS        | 54.40%             | 0.50%               | 53.90%         |
| READ  | 2689   | 6,922  | CO I   | G   | A           |                   | MSS        | 62.40%             | 0.00%               | 62.40%         |
| COAD  | 2679   | 9,253  | CO III | G   | A           |                   |            | 82.10%             | 0.00%               | 82.10%         |
| COAD  | 3509   | 10,562 | ND4L   | A   | AT          | No                |            | 16.96%             | 0.00%               | 16.96%         |
| READ  | A00C   | 10,947 | ND4    | C   | CC          | C6                | MSS        | 31.21%             | 0.00%               | 31.21%         |
| COAD  | 3693   | 11,867 | ND4    | C   | CC          | C6                | MSS        | 94.76%             | 0.42%               | 94.34%         |
| COAD  | A00Z   | 11,867 | ND4    | C   | CC/CCC/CCCC | C6                | MSS        | 77.12%             | 0.00%               | 77.12%         |
| COAD  | A02W   | 11,867 | ND4    | C   | CC          | C6                | MSI-L      | 60.42%             | 0.00%               | 60.42%         |
| READ  | A014   | 11,867 | ND4    | C   | CC          | C6                | MSS        | 95.58%             | 0.17%               | 95.41%         |
| COAD  | 4684   | 12,385 | ND5    | C   | CC          | C6                |            | 83.27%             | 0.00%               | 83.27%         |
| READ  | 4001   | 12,385 | ND5    | C   | CC          | C6                | MSI-L      | 79.73%             | 0.00%               | 79.73%         |
| AML   | 3009   | 12,418 | ND5    | A   | AA          | A8                |            | 44.33%             | 1.21%               | 43.12%         |
| COAD  | 3548   | 12,418 | ND5    | A   | AA          | A8                | MSS        | 49.42%             | 0.80%               | 48.63%         |
| COAD  | 3553   | 12,418 | ND5    | A   | AA          | A8                | MSI-L      | 85.34%             | 1.41%               | 83.93%         |
| COAD  | 3810   | 12,418 | ND5    | A   | AA          | A8                | MSS        | 81.07%             | 0.69%               | 80.38%         |
| COAD  | 3970   | 12,418 | ND5    | A   | AA          | A8                |            | 40.33%             | 0.58%               | 39.75%         |
| COAD  | 4071   | 12,418 | ND5    | A   | AA          | A8                | MSS        | 84.91%             | 1.22%               | 83.69%         |
| COAD  | 4315   | 12,418 | ND5    | A   | AA          | A8                |            | 74.54%             | 0.00%               | 74.54%         |
| COAD  | 4682   | 12,418 | ND5    | A   | AA          | A8                |            | 78.78%             | 0.64%               | 78.14%         |
| COAD  | 4746   | 12,418 | ND5    | A   | AA          | A8                |            | 84.04%             | 0.00%               | 84.04%         |
| COAD  | 4747   | 12,418 | ND5    | A   | AA          | A8                |            | 47.26%             | 0.14%               | 47.12%         |
| READ  | 3896   | 12,418 | ND5    | A   | AA          | A8                | MSS        | 61.08%             | 0.41%               | 60.67%         |
| READ  | 3909   | 12,418 | ND5    | A   | AA          | A8                | MSS        | 76.69%             | 0.70%               | 76.00%         |
| READ  | 4015   | 12,418 | ND5    | A   | AA          | A8                | MSS        | 84.69%             | 1.02%               | 83.68%         |
| AML   | 2967   | 12,418 | ND5    | AA  | A           | A8                |            | 46.02%             | 4.41%               | 41.60%         |
| COAD  | 3666   | 12,418 | ND5    | AA  | A           | A8                | MSS        | 94.38%             | 1.37%               | 93.01%         |
| COAD  | 4308   | 12,418 | ND5    | A   | AA          | A8                |            | 73.19%             | 0.38%               | 72.81%         |
| OV    | 1027   | 12,418 | ND5    | AA  | A           | A8                |            | 35.58%             | 0.68%               | 34.90%         |
| COAD  | 3693   | 12,778 | ND5    | G   | A           |                   | MSS        | 86.60%             | 0.00%               | 86.60%         |
| COAD  | A00W   | 13,231 | ND5    | A   | AA          | A7                | MSS        | 12.95%             | 0.00%               | 12.95%         |
| READ  | 3890   | 13,714 | ND5    | G   | A           |                   | MSS        | 30.50%             | 0.00%               | 30.50%         |
| COAD  | 3715   | 13,754 | ND5    | CC  | C           | C5                | MSI-H      | 59.46%             | 0.56%               | 58.90%         |
| READ  | A016   | 13,763 | ND5    | C   | CC          | C5                |            | 93.25%             | 0.00%               | 93.25%         |
| COAD  | A03J   | 13,915 | ND5    | G   | A           |                   | MSS        | 77.00%             | 0.00%               | 77.00%         |
| COAD  | A01I   | 14,504 | ND6    | AA  | A           | A7                | MSS        | 96.17%             | 0.18%               | 95.99%         |
| READ  | 3999   | 14,504 | ND6    | AA  | A           | A7                | MSS        | 16.40%             | 0.00%               | 16.40%         |
| READ  | A00H   | 15,242 | Cyt b  | G   | A           |                   | MSS        | 75.10%             | 0.00%               | 75.10%         |
| READ  | A01L   | 15,594 | Cyt b  | CC  | C           | C5                | MSS        | 42.94%             | 0.00%               | 42.94%         |

Abbreviations: Pos, position in mitochondrial genome; Ref, reference base; Obs, observed base; MSI, microsatellite instability

### S5. AML and GBM tumors with reported IDH1 and IDH2 mutations.

| Sample | Cancer | Somatic mtDNA mutations* | Gene | Codon | Ref aa | Obs aa | Ref nt | Obs nt | % Obs | Depth |
|--------|--------|--------------------------|------|-------|--------|--------|--------|--------|-------|-------|
| 2969   | AML    | 0                        | IDH1 | 132   | R      | H      | C      | T      | 33%   | 30    |
| 2977   | AML    | 0                        | IDH1 | 132   | R      | C      | G      | A      | 41%   | 32    |
| 827    | GBM    | 0                        | IDH1 | 132   | R      | H      | C      | T      | 29%   | 1,438 |
| 1460   | GBM    | 0                        | IDH1 | 132   | R      | H      | C      | T      | 30%   | 40    |
| 2907   | AML    | 0                        | IDH2 | 140   | R      | Q      | C      | T      | 44%   | 27    |
| 2966   | AML    | 0                        | IDH2 | 140   | R      | Q      | C      | T      | 45%   | 20    |
| 2973   | AML    | 0                        | IDH2 | 140   | R      | Q      | C      | T      | 56%   | 27    |
| 2934   | AML    | 0                        | IDH2 | 140   | R      | Q      | C      | T      | 46%   | 90    |
| 2936   | AML    | 0                        | IDH2 | 140   | R      | Q      | C      | T      | 39%   | 61    |
| 3002   | AML    | 0                        | IDH2 | 140   | R      | L      | C      | A      | 42%   | 24    |

Abbreviations: aa, amino acid; nt, nucleotide; % Obs, percent of aligned sequence

reads that exhibit the observed nucleotide \*Somatic mtDNA mutations were found in

12 AML cases, none of which had mutant IDH. The p-value of this mutual exclusivity

is 0.028 (one-sided Fisher's exact test).

## S6. Base changes observed in mtDNA somatic mutations.

| <b>Substitution</b> | <b>Somatic substitutions<br/>(%) n=196</b> |
|---------------------|--------------------------------------------|
| <b>G-to-A</b>       | 118 (60%)                                  |
| <b>T-to-C</b>       | 43 (22%)                                   |
| <b>C-to-T</b>       | 15 (8%)                                    |
| <b>A-to-G</b>       | 10 (5%)                                    |
| <b>G-to-C</b>       | 4 (2%)                                     |
| <b>C-to-A</b>       | 3 (1.5%)                                   |
| <b>G-to-T</b>       | 1 (0.5%)                                   |
| <b>A-to-T</b>       | 1 (0.5%)                                   |
| <b>C-to-G</b>       | 1 (0.5%)                                   |
| <b>A-to-C</b>       | 0 (0%)                                     |
| <b>T-to-A</b>       | 0 (0%)                                     |
| <b>T-to-G</b>       | 0 (0%)                                     |

**S7. Distribution of each length of homopolymer tract within coding regions of the mitochondrial genome.**

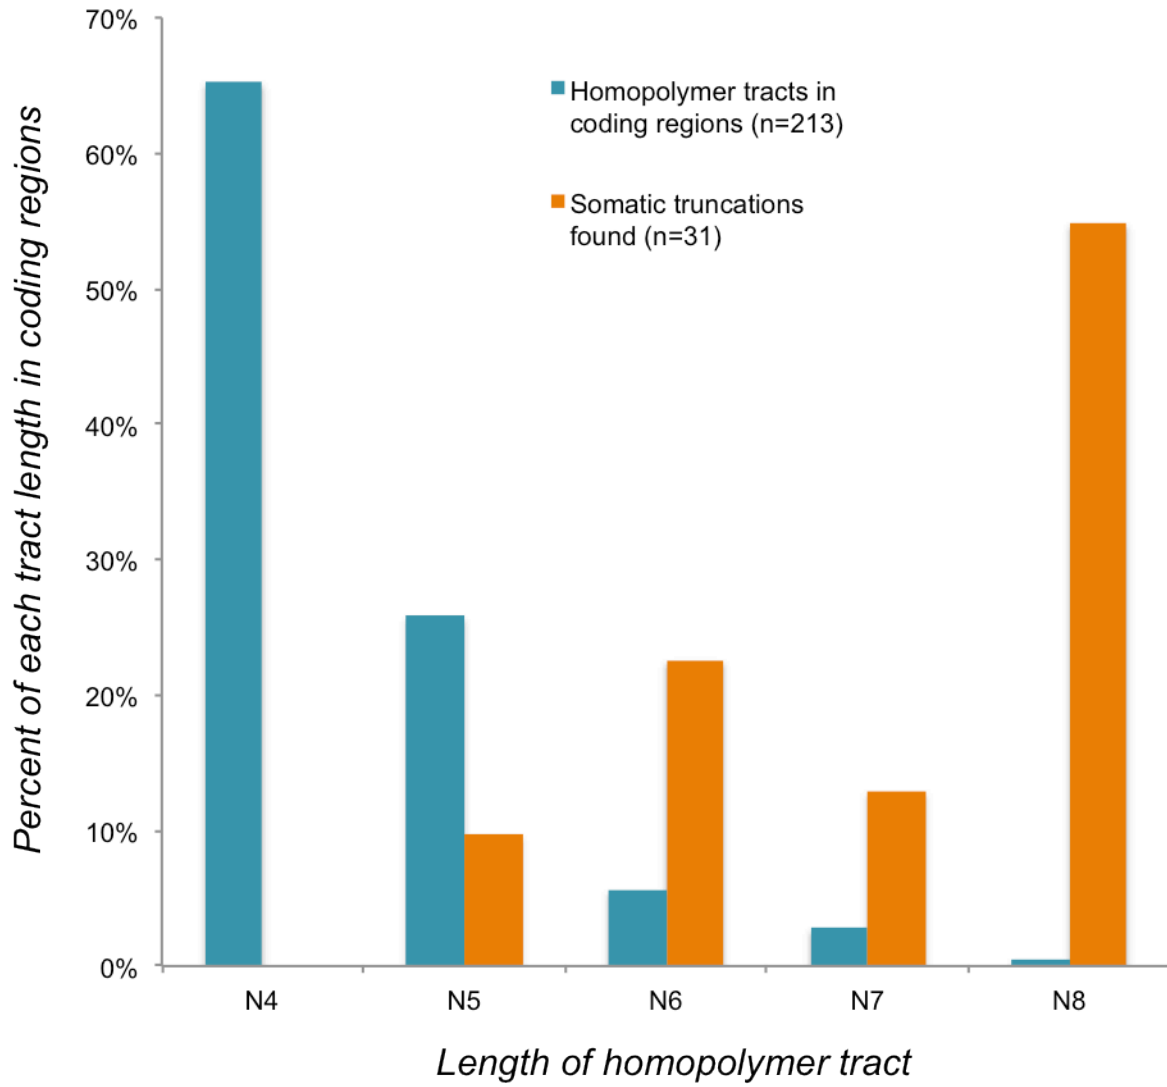

Supplement: 1211502109_sapp.pdf [file 1211502109_sapp.pdf]
